# Supplementary material for: New phosphotetradecavanadate hybrids: crystal structure, DFT analysis, stability and binding interactions with bio-macromolecules
Source: Royal Society of Chemistry journal article supplement (doi:10.1039/d2dt00690a), 2022-01-01
Supplement: d2dt00690a1.pdf [file d2dt00690a1.pdf]

## Electronic Supplementary Information section

Synthesis, structural characterization DFT analysis and study of binding interactions of new bicapped Keggin phosphotetradecavanadates

Rim Zarroug, Beñat Artetxe, Brahim Ayed, Xavier López, Nádia Ribeiro, Isabel Correia, João Costa Pessoa

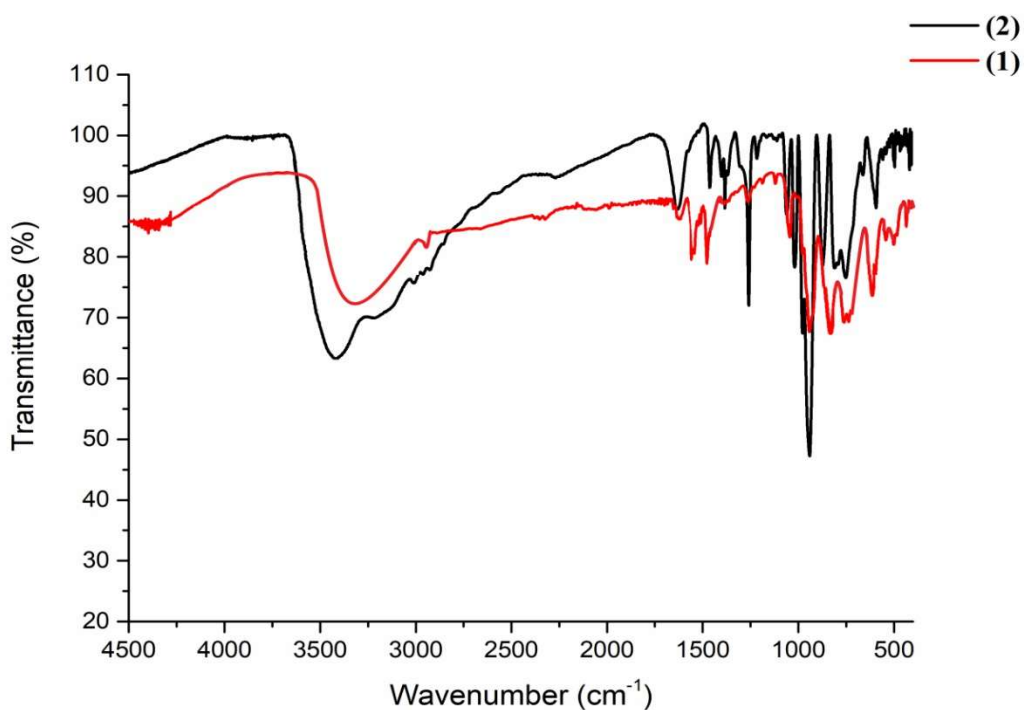

**Fig. S1.** FTIR spectra of compounds **1** and **2** measured in KBr disks.

## Single crystal X-ray diffraction data

**Table S1** Crystal data and structure refinement for compounds **1** and **2**.

|                                                                       | <b>Compound 1</b>                                                                                                   | <b>Compound 2</b>                                                                                                                                     |
|-----------------------------------------------------------------------|---------------------------------------------------------------------------------------------------------------------|-------------------------------------------------------------------------------------------------------------------------------------------------------|
| Empirical formula                                                     | (C <sub>6</sub> H <sub>8</sub> N) <sub>5</sub> [H <sub>4</sub> PV <sub>14</sub> O <sub>42</sub> ]·5H <sub>2</sub> O | (C <sub>6</sub> H <sub>14</sub> N <sub>4</sub> ) <sub>2</sub> (NH <sub>4</sub> )[H <sub>4</sub> PV <sub>14</sub> O <sub>42</sub> ]·11H <sub>2</sub> O |
| Formula weight (g.mol <sup>-1</sup> )                                 | 1980.91                                                                                                             | 1920.8                                                                                                                                                |
| Temperature (K)                                                       | 100                                                                                                                 | 100                                                                                                                                                   |
| Crystal system                                                        | Monoclinic                                                                                                          | Triclinic                                                                                                                                             |
| Space group                                                           | <i>P</i> 2 <sub>1</sub> / <i>c</i>                                                                                  | <i>P</i> -1                                                                                                                                           |
| <i>a</i> (Å)                                                          | 14.0745(3)                                                                                                          | 11.1991 (8)                                                                                                                                           |
| <i>b</i> (Å)                                                          | 34.2555(5)                                                                                                          | 11.4892 (9)                                                                                                                                           |
| <i>c</i> (Å)                                                          | 14.1623(3)                                                                                                          | 13.4138 (14)                                                                                                                                          |
| $\alpha$ (°)                                                          | 90                                                                                                                  | 67.429 (8)                                                                                                                                            |
| $\beta$ (°)                                                           | 115.364(2)                                                                                                          | 66.782 (8)                                                                                                                                            |
| $\gamma$ (°)                                                          | 90                                                                                                                  | 85.757(6)                                                                                                                                             |
| <i>V</i> (Å <sup>3</sup> )                                            | 6169.9(2)                                                                                                           | 1458.6 (2)                                                                                                                                            |
| $\rho_{\text{calcd}}$ (g cm <sup>-3</sup> )                           | 2.133                                                                                                               | 2.229                                                                                                                                                 |
| <i>Z</i>                                                              | 4                                                                                                                   | 1                                                                                                                                                     |
| $\mu$ (mm <sup>-1</sup> )                                             | 2.153                                                                                                               | 2.287                                                                                                                                                 |
| F(000)                                                                | 3928                                                                                                                | 954                                                                                                                                                   |
| Index ranges                                                          | -17 ≤ <i>h</i> ≤ 17 ; -40 ≤ <i>k</i> ≤ 41 ;<br>-16 ≤ <i>l</i> ≤ 17                                                  | -13 ≤ <i>h</i> ≤ 13 ; -11 ≤ <i>k</i> ≤ 14 ;<br>-16 ≤ <i>l</i> ≤ 16                                                                                    |
| Reflections collected                                                 | 45032                                                                                                               | 10022                                                                                                                                                 |
| Unique reflections ( <i>R</i> <sub>int</sub> )                        | 11472 (0.081)                                                                                                       | 5613 (0.054)                                                                                                                                          |
| Observed reflections                                                  | 9024                                                                                                                | 3550                                                                                                                                                  |
| [ <i>I</i> > 2σ( <i>I</i> )]                                          |                                                                                                                     |                                                                                                                                                       |
| Parameters (restraints)                                               | 914 (50)                                                                                                            | 478 (62)                                                                                                                                              |
| <i>R</i> ( <i>F</i> ) <sup>a</sup> [ <i>I</i> > 2σ( <i>I</i> )]       | 0.056                                                                                                               | 0.077                                                                                                                                                 |
| <i>wR</i> ( <i>F</i> <sup>2</sup> ) <sup>b</sup> [all data]           | 0.143                                                                                                               | 0.233                                                                                                                                                 |
| Goodness of Fit                                                       | 1.071                                                                                                               | 1.030                                                                                                                                                 |
| $\Delta\rho_{\text{max}}/\Delta\rho_{\text{min}}$ (eÅ <sup>-3</sup> ) | 2.30 /-0.84                                                                                                         | 2.11/-1.13                                                                                                                                            |

(a)  $R(F) = \frac{\sum ||F_o - F_c||}{\sum |F_o|}$ ;

(b)  $wR(F^2) = \left\{ \frac{\sum [w(F_o^2 - F_c^2)^2]}{\sum [w(F_o^2)^2]} \right\}^{1/2}$

**Table S2** Selected bond lengths [ $\text{\AA}$ ] for the anion in compound **1** ( $\text{\AA}$ )

| <i>Bond length (<math>\text{\AA}</math>)</i> | <i>X-ray</i> | <i>Bond length (<math>\text{\AA}</math>)</i> | <i>X-ray</i> |
|----------------------------------------------|--------------|----------------------------------------------|--------------|
| V1—O23                                       | 1.602 (4)    | V8—O4                                        | 1.833 (4)    |
| V1—O22                                       | 1.728 (4)    | V8—O1                                        | 1.874 (4)    |
| V1—O25                                       | 1.916 (4)    | V8—O2                                        | 1.915 (4)    |
| V1—O2                                        | 1.943 (4)    | V9—O35                                       | 1.616 (4)    |
| V1—O4                                        | 2.070 (4)    | V9—O27                                       | 1.721 (4)    |
| V1—O7                                        | 2.371 (4)    | V9—O15                                       | 1.920 (4)    |
| V2—O21                                       | 1.616 (4)    | V9—O20                                       | 1.933 (4)    |
| V2—O25                                       | 1.727 (4)    | V9—O13                                       | 2.024 (4)    |
| V2—O6                                        | 1.880 (3)    | V9—O9                                        | 2.323 (4)    |
| V2—O19                                       | 1.966 (4)    | V10—O39                                      | 1.597 (4)    |
| V2—O8                                        | 2.03 (4)     | V10—O28                                      | 1.740 (4)    |
| V2—O3                                        | 2.360 (4)    | V10—O27                                      | 1.927 (4)    |
| V3—O14                                       | 1.600 (4)    | V10—O5                                       | 1.932 (4)    |
| V3—O6                                        | 1.731 (4)    | V10—O16                                      | 2.045 (4)    |
| V3—O4                                        | 1.914 (4)    | V10—O11                                      | 2.386 (4)    |
| V3—O1                                        | 1.967 (4)    | V11—O37                                      | 1.594 (4)    |
| V3—O9                                        | 2.061 (4)    | V11—O20                                      | 1.746 (4)    |
| V4—O30                                       | 1.601 (4)    | V11—O33                                      | 1.914 (4)    |
| V4—O19                                       | 1.747 (4)    | V11—O1                                       | 1.922 (4)    |
| V4—O12                                       | 1.892 (4)    | V11—O18                                      | 2.047 (4)    |
| V4—O17                                       | 1.955 (4)    | V11—O9                                       | 2.408 (3)    |
| V4—O10                                       | 2.050 (4)    | V12—O34                                      | 1.594 (4)    |
| V4—O3                                        | 2.380 (3)    | V12—O38                                      | 1.724 (4)    |
| V5—O31                                       | 1.602 (4)    | V12—O29                                      | 1.928 (4)    |
| V5—O15                                       | 1.731 (4)    | V12—O18                                      | 1.958 (4)    |
| V5—O8                                        | 1.927 (4)    | V12—O2                                       | 2.065 (4)    |
| V5—O16                                       | 1.945 (4)    | V12—O7                                       | 2.354 (4)    |
| V5—O17                                       | 2.065 (4)    | V13—O42                                      | 1.617 (4)    |
| V5—O3                                        | 2.352 (4)    | V13—O10                                      | 1.822 (4)    |
| V6—O32                                       | 1.596 (4)    | V13—O16                                      | 1.836 (4)    |

|        |           |         |           |
|--------|-----------|---------|-----------|
| V6—O12 | 1.764 (4) | V13—O5  | 1.871 (4) |
| V6—O26 | 1.905 (4) | V13—O17 | 1.949 (4) |
| V6—O22 | 1.937 (4) | V14—O41 | 1.615 (4) |
| V6—O29 | 1.975 (4) | V14—O33 | 1.702 (4) |
| V6—O7  | 2.430 (3) | V14—O38 | 1.916 (4) |
| V7—O36 | 1.598 (4) | V14—O28 | 1.935 (4) |
| V7—O26 | 1.721 (4) | V14—O24 | 2.369 (4) |
| V7—O24 | 1.923 (4) | V14—O11 | 2.369 (4) |
| V7—O10 | 1.968 (4) | P—O7    | 1.532 (4) |
| V7—O5  | 2.075 (4) | P—O11   | 1.534 (4) |
| V7—O11 | 2.377 (4) | P—O9    | 1.539 (4) |
| V8—O40 | 1.614 (4) | P—O3    | 1.543 (4) |
| V8—O18 | 1.815 (4) |         |           |

**Table S3** Selected bond angles [°] for compound **1**.

| Bond angles [°] |             | Bond angles [°] |             |
|-----------------|-------------|-----------------|-------------|
| O23—V1—O22      | 101.51 (18) | O40—V8—O18      | 115.25 (19) |
| O23—V1—O25      | 101.52 (18) | O40—V8—O4       | 116.51 (18) |
| O22—V1—O25      | 94.04 (17)  | O18—V8—O4       | 128.17 (17) |
| O23—V1—O2       | 101.13 (17) | O40—V8—O1       | 104.69 (18) |
| O22—V1—O2       | 99.86 (17)  | O18—V8—O1       | 84.88 (17)  |
| O25—V1—O2       | 150.39 (16) | O4—V8—O1        | 84.81 (16)  |
| O23—V1—O4       | 96.46 (16)  | O40—V8—O2       | 102.72 (18) |
| O22—V1—O4       | 162.03 (16) | O18—V8—O2       | 83.68 (16)  |
| O25—V1—O4       | 82.41 (15)  | O4—V8—O2        | 82.87 (16)  |
| O2—V1—O4        | 76.31 (15)  | O1—V8—O2        | 152.59 (16) |
| O23—V1—O7       | 172.99 (17) | O35—V9—O27      | 103.88 (19) |
| O22—V1—O7       | 78.10 (15)  | O35—V9—O15      | 101.07 (19) |
| O25—V1—O7       | 85.49 (14)  | O27—V9—O15      | 90.27 (17)  |
| O2—V1—O7        | 72.15 (14)  | O35—V9—O20      | 95.50 (19)  |
| O4—V1—O7        | 84.05 (13)  | O27—V9—O20      | 97.32 (18)  |
| O21—V2—O25      | 103.81 (18) | O15—V9—O20      | 159.57 (16) |
| O21—V2—O6       | 101.77 (18) | O35—V9—O13      | 95.12 (18)  |
| O25—V2—O6       | 92.12 (16)  | O27—V9—O13      | 160.93 (17) |

|            |             |             |             |
|------------|-------------|-------------|-------------|
| O21—V2—O19 | 96.45 (17)  | O15—V9—O13  | 84.44 (16)  |
| O25—V2—O19 | 93.93 (16)  | O20—V9—O13  | 82.24 (16)  |
| O6—V2—O19  | 158.83 (16) | O35—V9—O9   | 164.86 (17) |
| O21—V2—O8  | 94.99 (17)  | O27—V9—O9   | 89.87 (16)  |
| O25—V2—O8  | 161.09 (17) | O15—V9—O9   | 84.92 (14)  |
| O6—V2—O8   | 85.94 (15)  | O20—V9—O9   | 76.19 (14)  |
| O19—V2—O8  | 81.79 (15)  | O13—V9—O9   | 71.44 (14)  |
| O21—V2—O3  | 164.59 (16) | O39—V10—O28 | 101.7 (2)   |
| O25—V2—O3  | 89.25 (15)  | O39—V10—O27 | 102.69 (19) |
| O6—V2—O3   | 85.62 (14)  | O28—V10—O27 | 92.73 (18)  |
| O19—V2—O3  | 74.20 (14)  | O39—V10—O5  | 100.29 (18) |
| O8—V2—O3   | 71.85 (14)  | O28—V10—O5  | 99.46 (18)  |
| O14—V3—O6  | 104.40 (19) | O27—V10—O5  | 151.17 (16) |
| O14—V3—O13 | 97.50 (19)  | O39—V10—O16 | 96.84 (19)  |
| O6—V3—O13  | 96.06 (17)  | O28—V10—O16 | 161.47 (17) |
| O14—V3—O4  | 101.07 (18) | O27—V10—O16 | 82.02 (16)  |
| O6—V3—O4   | 91.49 (16)  | O5—V10—O16  | 78.15 (16)  |
| O13—V3—O4  | 157.53 (17) | O39—V10—O11 | 173.09 (17) |
| O14—V3—O1  | 97.90 (17)  | O28—V10—O11 | 78.25 (15)  |
| O6—V3—O1   | 156.44 (16) | O27—V10—O11 | 84.20 (14)  |
| O13—V3—O1  | 88.38 (16)  | O5—V10—O11  | 73.00 (14)  |
| O4—V3—O1   | 76.68 (14)  | O16—V10—O11 | 83.53 (14)  |
| O14—V3—O9  | 164.00 (16) | O37—V11—O20 | 100.9 (2)   |
| O6—V3—O9   | 88.79 (15)  | O37—V11—O33 | 102.95 (19) |
| O13—V3—O9  | 71.71 (15)  | O20—V11—O33 | 92.62 (18)  |
| O4—V3—O9   | 87.37 (14)  | O37—V11—O1  | 101.36 (18) |
| O1—V3—O9   | 70.61 (13)  | O20—V11—O1  | 99.17 (17)  |
| O30—V4—O19 | 101.13 (19) | O33—V11—O1  | 150.35 (16) |
| O30—V4—O12 | 102.03 (18) | O37—V11—O18 | 98.05 (19)  |
| O19—V4—O12 | 95.76 (17)  | O20—V11—O18 | 160.99 (16) |
| O30—V4—O17 | 98.85 (18)  | O33—V11—O18 | 82.41 (16)  |
| O19—V4—O17 | 97.65 (17)  | O1—V11—O18  | 77.62 (15)  |
| O12—V4—O17 | 152.45 (16) | O37—V11—O9  | 172.89 (18) |

|            |             |             |             |
|------------|-------------|-------------|-------------|
| O30—V4—O10 | 96.71 (18)  | O20—V11—O9  | 77.25 (15)  |
| O19—V4—O10 | 162.06 (16) | O33—V11—O9  | 84.04 (14)  |
| O12—V4—O10 | 82.30 (16)  | O1—V11—O9   | 72.34 (13)  |
| O17—V4—O10 | 77.56 (15)  | O18—V11—O9  | 83.97 (13)  |
| O30—V4—O3  | 170.32 (18) | O34—V12—O38 | 104.4 (2)   |
| O19—V4—O3  | 77.44 (14)  | O34—V12—O29 | 96.98 (19)  |
| O12—V4—O3  | 87.65 (14)  | O38—V12—O29 | 97.92 (18)  |
| O17—V4—O3  | 72.03 (13)  | O34—V12—O18 | 100.18 (19) |
| O10—V4—O3  | 84.65 (13)  | O38—V12—O18 | 90.85 (17)  |
| O31—V5—O15 | 104.53 (19) | O29—V12—O18 | 158.14 (16) |
| O31—V5—O8  | 97.53 (18)  | O34—V12—O2  | 96.73 (18)  |
| O1—V5—O8   | 96.33 (16)  | O38—V12—O2  | 157.03 (18) |
| O1—V5—O16  | 98.99 (19)  | O29—V12—O2  | 88.26 (16)  |
| O6—V5—O16  | 91.92 (17)  | O18—V12—O2  | 76.41 (15)  |
| O6—V5—O16  | 159.05 (16) | O34—V12—O7  | 164.04 (18) |
| O31—V5—O17 | 96.13 (17)  | O38—V12—O7  | 89.87 (16)  |
| O15—V5—O17 | 157.77 (17) | O29—V12—O7  | 73.59 (14)  |
| O8—V5—O17  | 88.92 (15)  | O18—V12—O7  | 86.51 (14)  |
| O16—V5—O17 | 76.60 (15)  | O2—V12—O7   | 70.59 (13)  |
| O31—V5—O3  | 164.16 (16) | O42—V13—O10 | 115.33 (19) |
| O15—V5—O3  | 89.81 (15)  | O42—V13—O16 | 117.18 (19) |
| O8—V5—O3   | 73.80 (14)  | O10—V13—O16 | 127.18 (17) |
| O16—V5—O3  | 87.04 (14)  | O42—V13—O5  | 106.0 (2)   |
| O32—V6—O12 | 103.32 (19) | O10—V13—O5  | 86.00 (17)  |
| O32—V6—O26 | 100.96 (19) | O16—V13—O5  | 85.16 (17)  |
| O12—V6—O26 | 90.87 (17)  | O42—V13—O17 | 100.5 (2)   |
| O32—V6—O22 | 99.17 (18)  | O10—V13—O17 | 83.38 (16)  |
| O12—V6—O22 | 93.22 (17)  | O16—V13—O17 | 82.09 (16)  |
| O26—V6—O22 | 157.93 (16) | O5—V13—O17  | 153.48 (16) |
| O32—V6—O29 | 96.94 (19)  | O41—V14—O33 | 104.0 (2)   |
| O12—V6—O29 | 159.70 (16) | O41—V14—O38 | 100.7 (2)   |
| O26—V6—O29 | 86.33 (17)  | O33—V14—O38 | 91.95 (18)  |
| O22—V6—O29 | 82.34 (16)  | O41—V14—O28 | 97.4 (2)    |

|            |             |             |             |
|------------|-------------|-------------|-------------|
| O32—V6—O7  | 166.23 (17) | O33—V14—O28 | 97.05 (18)  |
| O12—V6—O7  | 88.68 (14)  | O38—V14—O28 | 157.24 (17) |
| O26—V6—O7  | 85.36 (14)  | O41—V14—O24 | 94.9 (2)    |
| O22—V6—O7  | 73.07 (13)  | O33—V14—O24 | 161.02 (18) |
| O29—V6—O7  | 71.07 (14)  | O38—V14—O24 | 82.64 (17)  |
| O36—V7—O26 | 104.73 (19) | O28—V14—O24 | 82.11 (17)  |
| O36—V7—O24 | 98.2 (2)    | O41—V14—O11 | 164.83 (18) |
| O26—V7—O24 | 97.67 (19)  | O33—V14—O11 | 90.22 (16)  |
| O36—V7—O10 | 100.00 (19) | O38—V14—O11 | 83.83 (15)  |
| O26—V7—O10 | 90.24 (17)  | O28—V14—O11 | 75.30 (14)  |
| O24—V7—O10 | 157.56 (17) | O24—V14—O11 | 71.16 (15)  |
| O36—V7—O5  | 94.86 (18)  | O7—P—O11    | 108.7 (2)   |
| O26—V7—O5  | 158.29 (17) | O7—P—O9     | 110.3 (2)   |
| O24—V7—O5  | 88.53 (18)  | O11—P—O9    | 109.67 (19) |
| O10—V7—O5  | 77.03 (15)  | O7—P—O3     | 109.3 (2)   |
| O36—V7—O11 | 163.07 (18) | O11—P—O3    | 110.7 (2)   |
| O26—V7—O11 | 90.96 (15)  | O9—P—O3     | 108.1 (2)   |
| O24—V7—O11 | 72.93 (16)  |             |             |
| O10—V7—O11 | 86.03 (14)  |             |             |
| O5—V7—O11  | 70.92 (13)  |             |             |

**Table S4** Selected bond lengths [ $\text{\AA}$ ] for the anion in compound **2** ( $\text{\AA}$ )

|                     | Bond length ( $\text{\AA}$ ) |                     | Bond length ( $\text{\AA}$ ) |
|---------------------|------------------------------|---------------------|------------------------------|
| V1—O15              | 1.585 (7)                    | V5—O2               | 1.592 (6)                    |
| V1—O6               | 1.770 (7)                    | V5—O18              | 1.825 (8)                    |
| V1—O11              | 1.820 (8)                    | V5—O14              | 1.851 (7)                    |
| V1—O4               | 1.989 (7)                    | V5—O23 <sup>i</sup> | 2.416 (12)                   |
| V1—O9               | 2.027 (7)                    | V5—O10 <sup>i</sup> | 1.921 (8)                    |
| V1—O22 <sup>i</sup> | 2.404 (12)                   | V6—O1               | 1.598 (7)                    |
| V2—O7               | 1.578 (7)                    | V6—O3               | 1.822 (6)                    |
| V2—O10              | 1.744 (8)                    | V6—O9               | 1.849 (7)                    |

|                     |            |                     |            |
|---------------------|------------|---------------------|------------|
| V2—O13              | 1.868 (9)  | V6—O5               | 1.867 (7)  |
| V2—O9               | 1.966 (7)  | V6—O4               | 1.887 (6)  |
| V2—O3               | 2.036 (7)  | V7—O17              | 1.589 (6)  |
| V2—O21              | 2.470 (11) | V7—O12              | 1.806 (7)  |
| V3—O8               | 1.598 (6)  | V7—O18              | 1.810 (7)  |
| V3—O12              | 1.821 (7)  | V7—O4               | 1.984 (7)  |
| V3—O13 <sup>i</sup> | 1.854 (9)  | V7—O5               | 2.003 (6)  |
| V3—O19 <sup>i</sup> | 1.906 (8)  | V7—O23 <sup>i</sup> | 2.376 (11) |
| V3—O6               | 1.933 (7)  | P—O22               | 1.479 (11) |
| V3—O22 <sup>i</sup> | 2.467 (11) | P—O22 <sup>i</sup>  | 1.479 (11) |
| V4—O16              | 1.589 (6)  | P—O23               | 1.552 (11) |
| V4—O14              | 1.756 (7)  | P—O23 <sup>i</sup>  | 1.552 (11) |
| V4—O19              | 1.797 (9)  | P—O20               | 1.558 (11) |
| V4—O5               | 2.007 (7)  | P—O20 <sup>i</sup>  | 1.558 (11) |
| V4—O3               | 2.033 (6)  | P—O21               | 1.566 (10) |
| V4—O21              | 2.425 (12) | P—O21 <sup>i</sup>  | 1.566 (10) |
| V5—O11 <sup>i</sup> | 1.922 (8)  |                     |            |

**Table S5** Selected bond angles [°] for compound **2**.

| Bond angles [°] |           | Bond angles [°]                       |           |
|-----------------|-----------|---------------------------------------|-----------|
| O15—V1—O6       | 101.3 (4) | O2—V5—O18                             | 100.1 (4) |
| O15—V1—O11      | 99.0 (4)  | O2—V5—O14                             | 100.8 (4) |
| O6—V1—O11       | 96.7 (4)  | O18—V5—O14                            | 90.2 (4)  |
| O15—V1—O4       | 99.9 (3)  | O2—V5—O10 <sup>i</sup>                | 97.0 (4)  |
| O6—V1—O4        | 92.4 (3)  | O18—V5—O10 <sup>i</sup>               | 90.7 (4)  |
| O11—V1—O4       | 156.9 (3) | O14—V5—O10 <sup>i</sup>               | 161.7 (5) |
| O15—V1—O9       | 97.3 (3)  | O2—V5—O11 <sup>i</sup>                | 98.0 (4)  |
| O6—V1—O9        | 159.3 (3) | O18—V5—O11 <sup>i</sup>               | 161.8 (5) |
| O11—V1—O9       | 89.1 (3)  | O14—V5—O11 <sup>i</sup>               | 88.1 (4)  |
| O4—V1—O9        | 75.5 (2)  | O10 <sup>i</sup> —V5—O11 <sup>i</sup> | 85.3 (3)  |
| O15—V1—O20      | 155.1 (4) | O2—V5—O20 <sup>i</sup>                | 155.4 (4) |
| O6—V1—O20       | 99.5 (4)  | O18—V5—O20 <sup>i</sup>               | 98.5 (4)  |
| O11—V1—O20      | 65.1 (4)  | O14—V5—O20 <sup>i</sup>               | 94.9 (4)  |
| O4—V1—O20       | 92.5 (3)  | O10 <sup>i</sup> —V5—O20 <sup>i</sup> | 66.8 (4)  |



|                                       |           |                                       |           |
|---------------------------------------|-----------|---------------------------------------|-----------|
| O9—V1—O20                             | 64.9 (4)  | O11 <sup>i</sup> —V5—O20 <sup>i</sup> | 63.6 (4)  |
| O7—V2—O10                             | 103.1 (5) | O1—V6—O3                              | 110.5 (3) |
| O7—V2—O13                             | 100.1 (5) | O1—V6—O9                              | 110.4 (4) |
| O10—V2—O13                            | 94.3 (4)  | O3—V6—O9                              | 84.7 (3)  |
| O7—V2—O9                              | 100.5 (4) | O1—V6—O5                              | 108.6 (4) |
| O10—V2—O9                             | 93.0 (3)  | O3—V6—O5                              | 84.9 (3)  |
| O13—V2—O9                             | 156.0 (4) | O9—V6—O5                              | 140.8 (4) |
| O7—V2—O3                              | 97.9 (4)  | O1—V6—O4                              | 107.9 (3) |
| O10—V2—O3                             | 157.9 (4) | O3—V6—O4                              | 141.6 (3) |
| O13—V2—O3                             | 88.7 (3)  | O9—V6—O4                              | 82.4 (3)  |
| O9—V2—O3                              | 76.3 (3)  | O5—V6—O4                              | 82.8 (3)  |
| O7—V2—O20                             | 159.3 (4) | O17—V7—O12                            | 103.0 (4) |
| O10—V2—O20                            | 66.8 (4)  | O17—V7—O18                            | 102.4 (4) |
| O13—V2—O20                            | 98.7 (5)  | O12—V7—O18                            | 94.4 (4)  |
| O9—V2—O20                             | 63.5 (3)  | O17—V7—O4                             | 99.5 (3)  |
| O3—V2—O20                             | 91.1 (3)  | O12—V7—O4                             | 90.4 (3)  |
| O8—V3—O12                             | 99.7 (4)  | O18—V7—O4                             | 155.9 (4) |
| O8—V3—O13 <sup>i</sup>                | 99.0 (5)  | O17—V7—O5                             | 98.3 (3)  |
| O12—V3—O13 <sup>i</sup>               | 93.4 (4)  | O12—V7—O5                             | 156.8 (4) |
| O8—V3—O19 <sup>i</sup>                | 99.3 (5)  | O18—V7—O5                             | 89.9 (3)  |
| O12—V3—O19 <sup>i</sup>               | 160.4 (4) | O4—V7—O5                              | 77.0 (2)  |
| O13 <sup>i</sup> —V3—O19 <sup>i</sup> | 88.3 (4)  | O17—V7—O23 <sup>i</sup>               | 157.1 (4) |
| O8—V3—O6                              | 98.0 (4)  | O12—V7—O23 <sup>i</sup>               | 98.0 (4)  |
| O12—V3—O6                             | 87.1 (3)  | O18—V7—O23 <sup>i</sup>               | 66.6 (4)  |
| O13 <sup>i</sup> —V3—O6               | 162.6 (5) | O4—V7—O23 <sup>i</sup>                | 89.3 (3)  |
| O19 <sup>i</sup> —V3—O6               | 85.6 (3)  | O5—V7—O23 <sup>i</sup>                | 63.0 (4)  |
| O8—V3—O21 <sup>i</sup>                | 158.7 (4) | O22 <sup>i</sup> —P—O23               | 113.2 (6) |
| O12—V3—O21 <sup>i</sup>               | 97.6 (4)  | O22—P—O23 <sup>i</sup>                | 113.2 (6) |
| O13 <sup>i</sup> —V3—O21 <sup>i</sup> | 67.6 (5)  | O22—P—O20                             | 111.5 (6) |
| O19 <sup>i</sup> —V3—O21 <sup>i</sup> | 65.0 (4)  | O23 <sup>i</sup> —P—O20               | 107.5 (6) |
| O6—V3—O21 <sup>i</sup>                | 95.2 (4)  | O22 <sup>i</sup> —P—O20 <sup>i</sup>  | 111.5 (6) |
| O16—V4—O14                            | 102.1 (4) | O23—P—O20 <sup>i</sup>                | 107.5 (6) |
| O16—V4—O19                            | 100.2 (4) | O22 <sup>i</sup> —P—O21               | 111.4 (6) |
| O14—V4—O19                            | 96.8 (4)  | O23—P—O21                             | 106.8 (5) |
| O16—V4—O5                             | 99.0 (3)  | O20 <sup>i</sup> —P—O21               | 105.9 (6) |
| O14—V4—O5                             | 90.3 (3)  | O22—P—O21 <sup>i</sup>                | 111.4 (6) |
| O19—V4—O5                             | 157.6 (4) |                                       |           |
| O16—V4—O3                             | 96.9 (3)  |                                       |           |
| O14—V4—O3                             | 158.2 (3) |                                       |           |
| O19—V4—O3                             | 90.2 (3)  |                                       |           |
| O5—V4—O3                              | 76.1 (3)  |                                       |           |

|                         |           |  |  |
|-------------------------|-----------|--|--|
| O16—V4—O23 <sup>i</sup> | 158.2 (3) |  |  |
| O14—V4—O23 <sup>i</sup> | 68.1 (4)  |  |  |
| O19—V4—O23 <sup>i</sup> | 100.2 (4) |  |  |
| O5—V4—O23 <sup>i</sup>  | 62.8 (4)  |  |  |
| O3—V4—O23 <sup>i</sup>  | 90.4 (3)  |  |  |

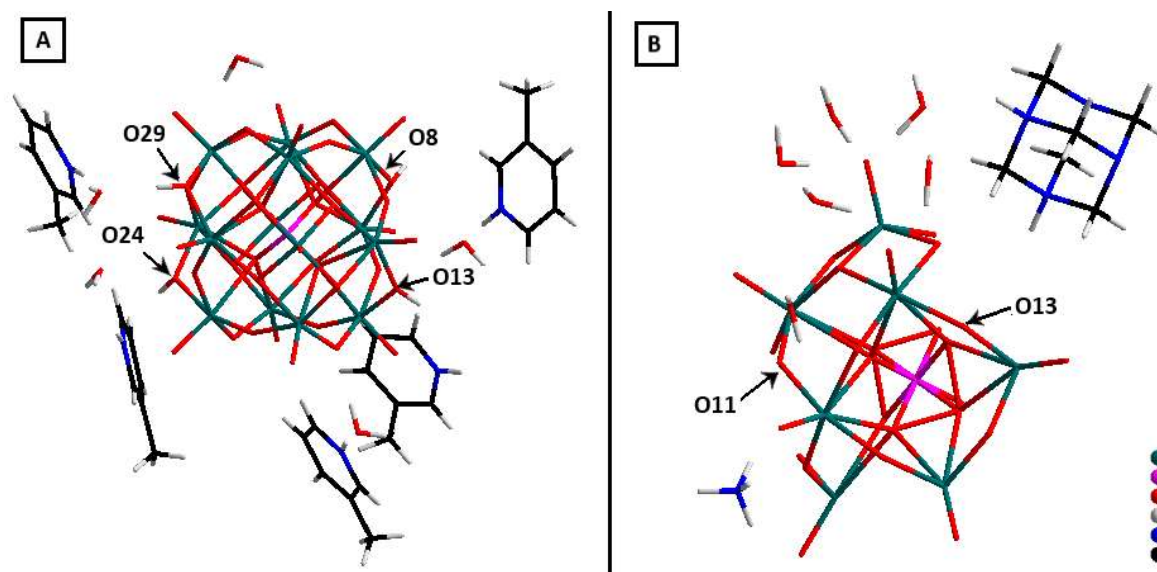

**Fig S2** View of the asymmetric unit contents for the crystal structures of compounds **1** and **2**.

**Table S6** Hydrogen bonds for compound 1.

| D-H... A                       | d(D-H) | d(H..A) | <DHA   | d(D..A) |
|--------------------------------|--------|---------|--------|---------|
| N3-HN3...OW2                   | 1.081  | 1.744   | 151.92 | 2.746   |
| O24- HO24...O41 <sup>i</sup>   | 0.690  | 1.999   | 165.66 | 2.673   |
| O13-HO13 ... O21 <sup>ii</sup> | 0.733  | 1.975   | 175.12 | 2.706   |
| O17-HN2...N2                   | 0.600  | 2.065   | 161.57 | 2.641   |
| OW1-HW2...N1                   | 0.866  | 2.102   | 126.75 | 2.711   |
| N1-HN1 ... OW1                 | 0.895  | 1.821   | 172.16 | 2.711   |
| N5-HN*5... OW3 <sup>iii</sup>  | 1.195  | 1.499   | 173.23 | 2.690   |
| OW5-HWA... OW2                 | 0.868  | 2.187   | 116.57 | 2.690   |
| OW3-HW5... O15                 | 0.911  | 2.037   | 157.22 | 2.899   |
| OW1-HW1... OW3                 | 0.893  | 1.960   | 142.62 | 2.724   |
| OW3-HW6... O19 <sup>iv</sup>   | 1.265  | 1.507   | 156.76 | 2.715   |
| OW3-HW6... O30 <sup>v</sup>    | 1.265  | 2.479   | 114.21 | 3.211   |
| OW2-HW4 ... OW5                | 0.869  | 2.014   | 133.81 | 2.690   |
| OW2-HW3... O2 <sup>vi</sup>    | 1.047  | 1.696   | 153.56 | 2.674   |
| OW4-HW8... N5 <sup>vii</sup>   | 0.879  | 2.575   | 135.74 | 3.262   |
| OW4-HW7... O12                 | 0.873  | 2.196   | 131.98 | 2.854   |
| OW4-HW7... O32                 | 0.873  | 2.492   | 120.89 | 3.035   |
| N4-HN4... OW4 <sup>viii</sup>  | 0.869  | 1.928   | 160.79 | 2.764   |

**Symmetry codes** : (i): [ -x+2, -y+1, -z+1 ] ;(ii): [ x, -y+1/2, z-1/2 ] ;(iii): [ x, -y+1/2, z-1/2 ] ;(iv): [ x, -y+1/2, z-1/2 ] ; (v): [ x, -y+1/2, z-1/2 ] ; (vi): [ -x+1, -y+1, -z+1 ] ; (vii): [ x, y, z+1 ] ; (viii): [ -x+1, -y+1, -z+1 ] .

**Table S7** Hydrogen bonds for compound 2.

| D—H...A                     | D—H  | H...A | <DHA | D...A      |
|-----------------------------|------|-------|------|------------|
| N3—H4...O16 <sup>i</sup>    | 0.98 | 2.46  | 117  | 3.036 (10) |
| N3—H4...OW3                 | 0.98 | 1.95  | 144  | 2.805 (13) |
| N4—H8...O15 <sup>ii</sup>   | 0.98 | 2.63  | 118  | 3.211 (11) |
| N4—H8...OW5 <sup>iii</sup>  | 0.98 | 2.12  | 157  | 3.047 (13) |
| N24—H24D...O13              | 0.98 | 2.26  | 127  | 2.896(16)  |
| N24—H24D...O8 <sup>iv</sup> | 0.98 | 2.34  | 146  | 3.135(10)  |
| N24—H24B...O19 <sup>v</sup> | 0.98 | 2.38  | 126  | 3.003(13)  |

**Symmetry codes:**(i) -x+1, -y, -z+1; (ii) x+1, y, z; (iii)-x+1, -y+1,-z+1; (iv) x, y-1, z; (v) 1-x,-y, -z

## Powder X-Ray Diffraction data

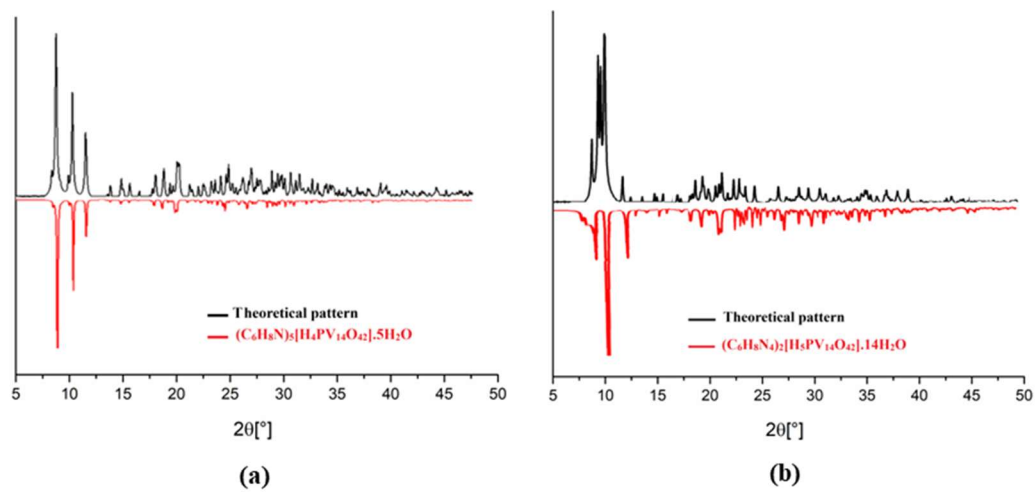

**Fig. S3** Powder X-Ray Diffraction pattern of compounds **1** and **2**.

## Hirshfeld surfaces Analysis

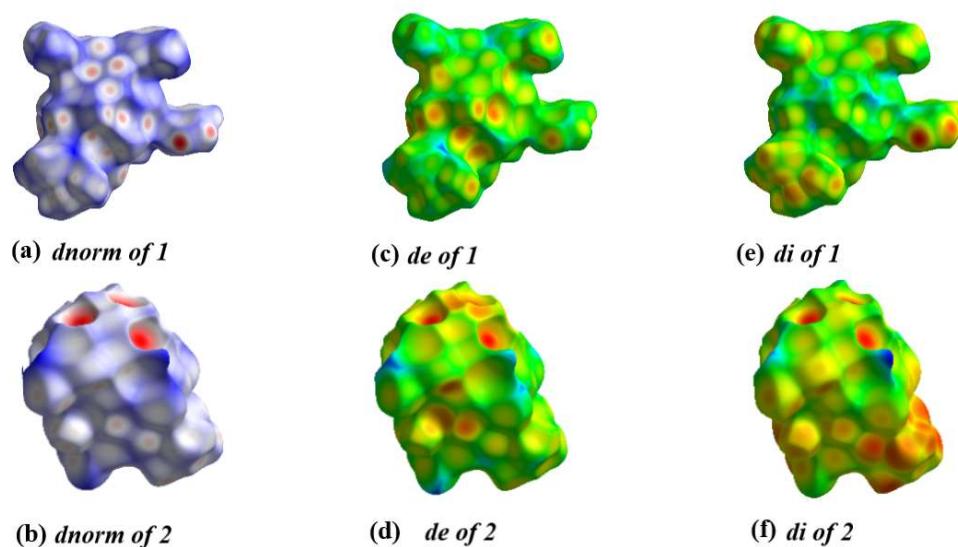

**Fig. S4** Hirshfeld surfaces mapped with *dnorm*, *di* and *de* of compounds **1** and **2** mapped over the ranges  $-0.717$  (red) to  $1.467$  (blue) for compound **1** and  $-1.091$  (red) to  $2.088$  (blue) for compound **2**.

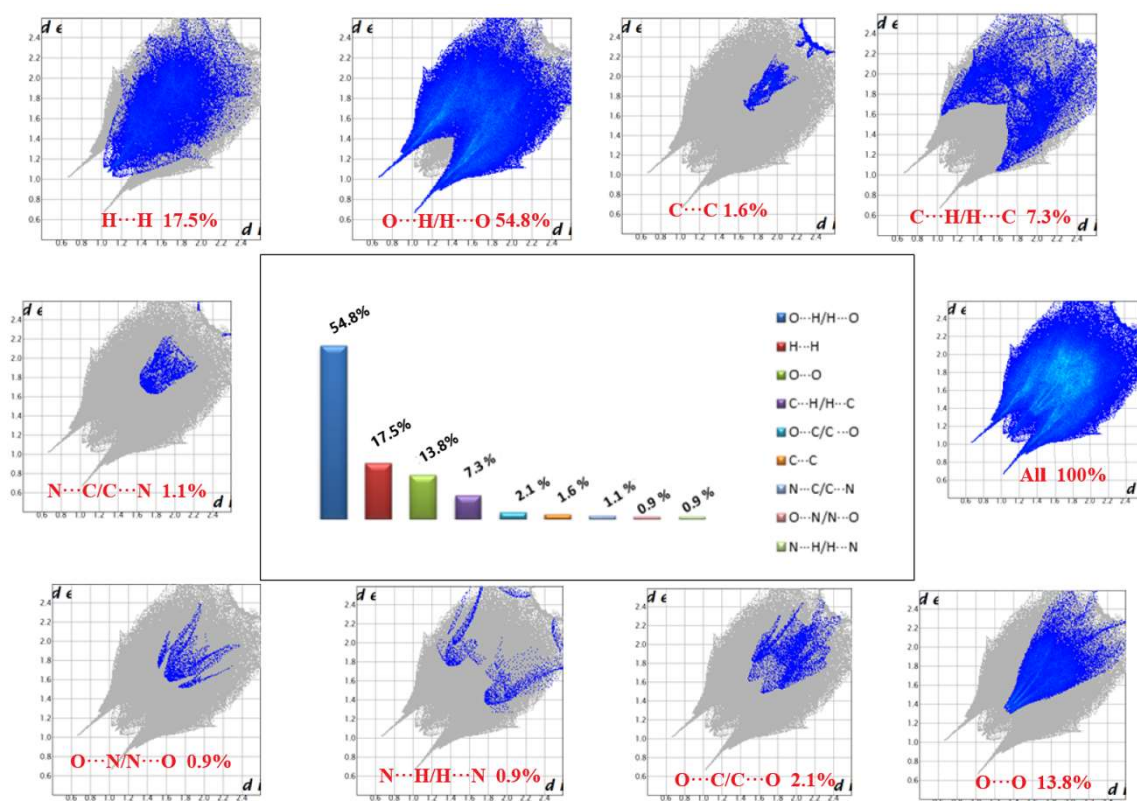

**Fig. S5** 2D fingerprint plots of **1** where contributions from different contacts may be accessed.

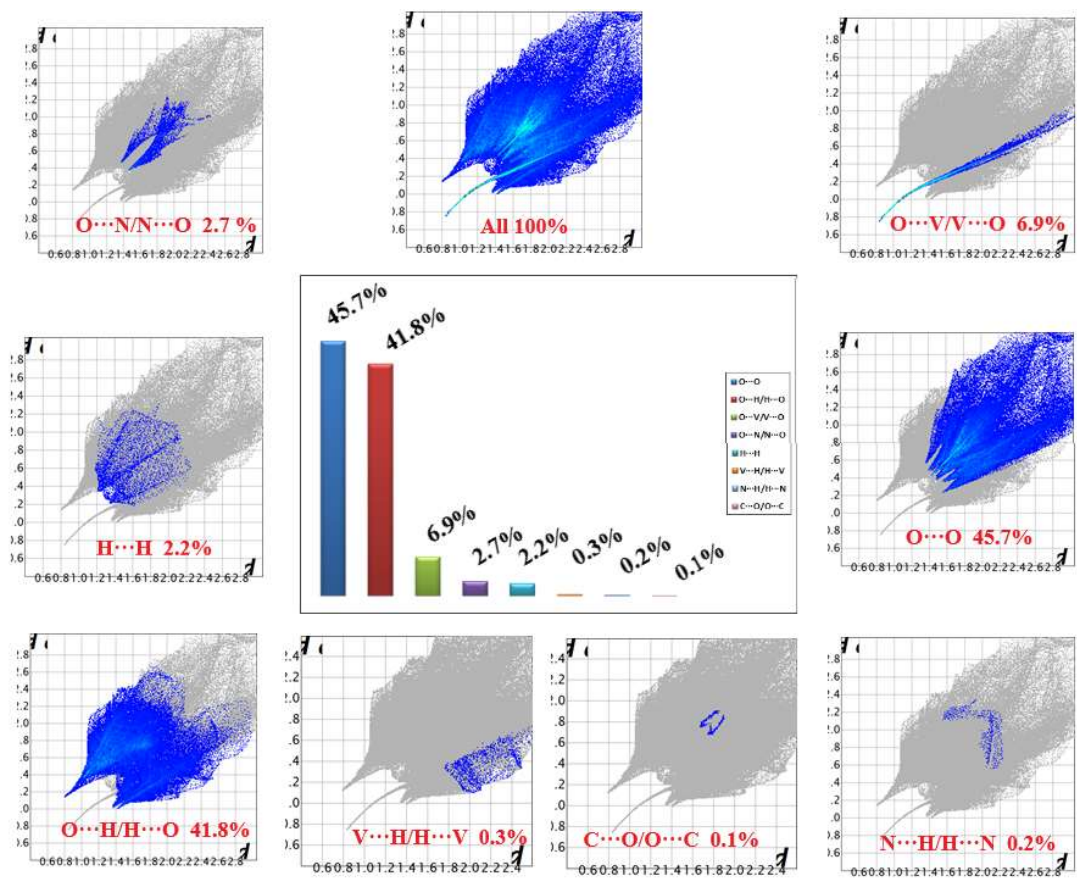

Fig. S6 2D fingerprint plots of 2.

## UV-Vis spectroscopic data

### Stability of PV14 compounds at pH = 7 (Hepes buffer) - UV-Vis spectra

Fig. S7 depicts UV-Vis spectra of solutions containing compound **2** in Hepes buffer at several distinct concentrations of PV14.

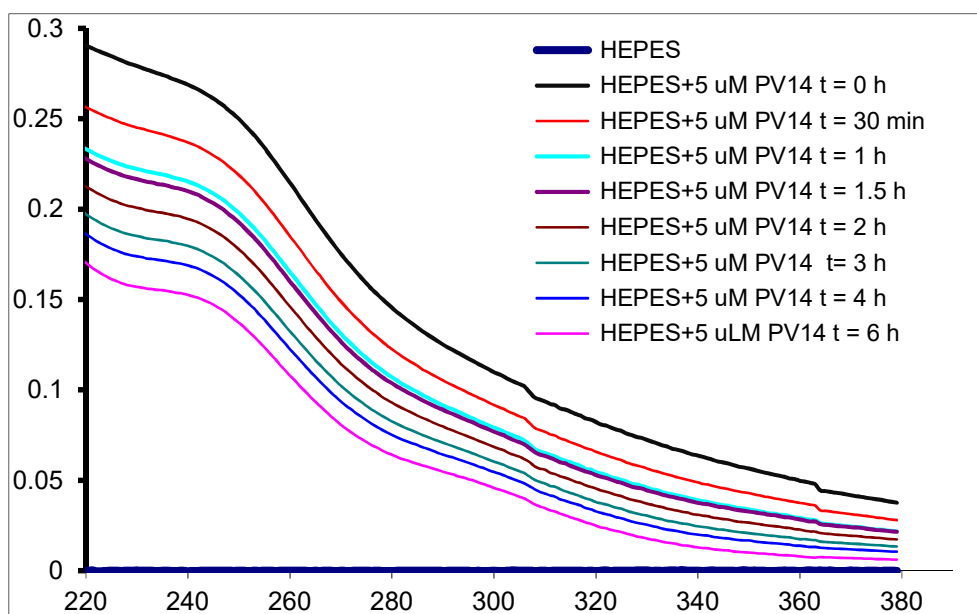

**Fig. S7a** UV-Vis spectra of compound **2** at a concentration of 5 μM in Hepes buffer at pH = 7.0. Changes of spectra with time at room temperature, path length = 10.0 mm.

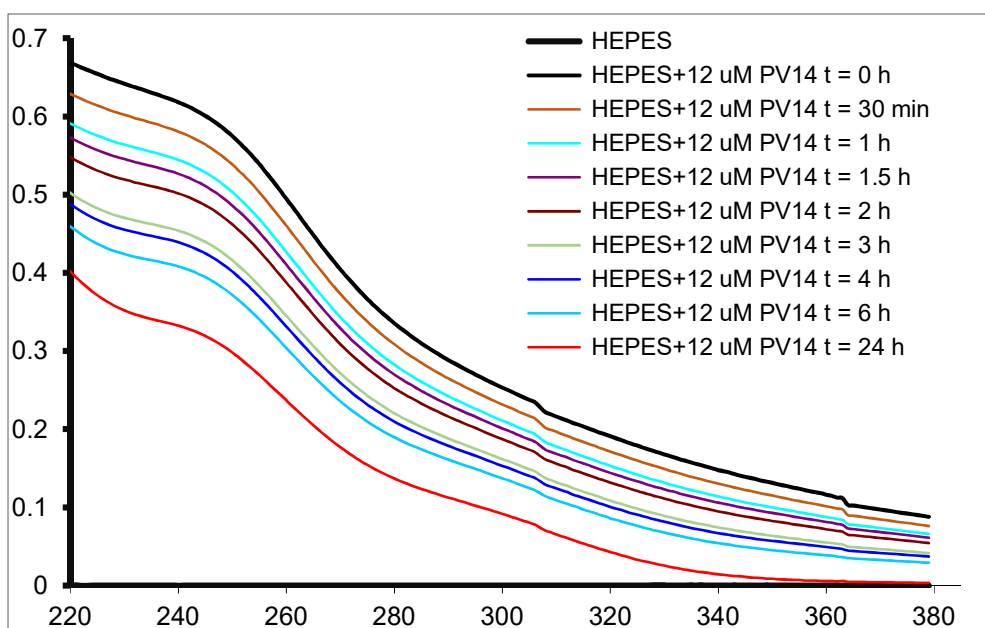

**Fig. S7b** UV-Vis spectra of compound **2** at a concentration of 12 μM in Hepes buffer at pH = 7.0. Changes of spectra with time at room temperature; path length = 10.0 mm.

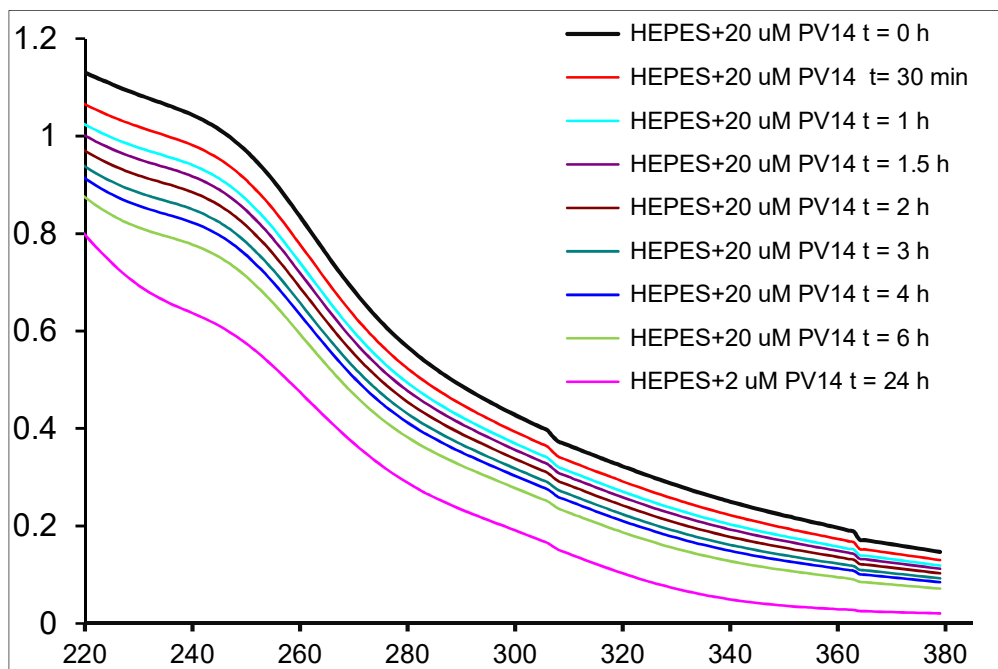

**Fig. S7c** UV-Vis spectra of compound **2** at a concentration of 20 μM in HEPES buffer at pH = 7.0. Changes of spectra with time at room temperature; path length = 10.0 mm.

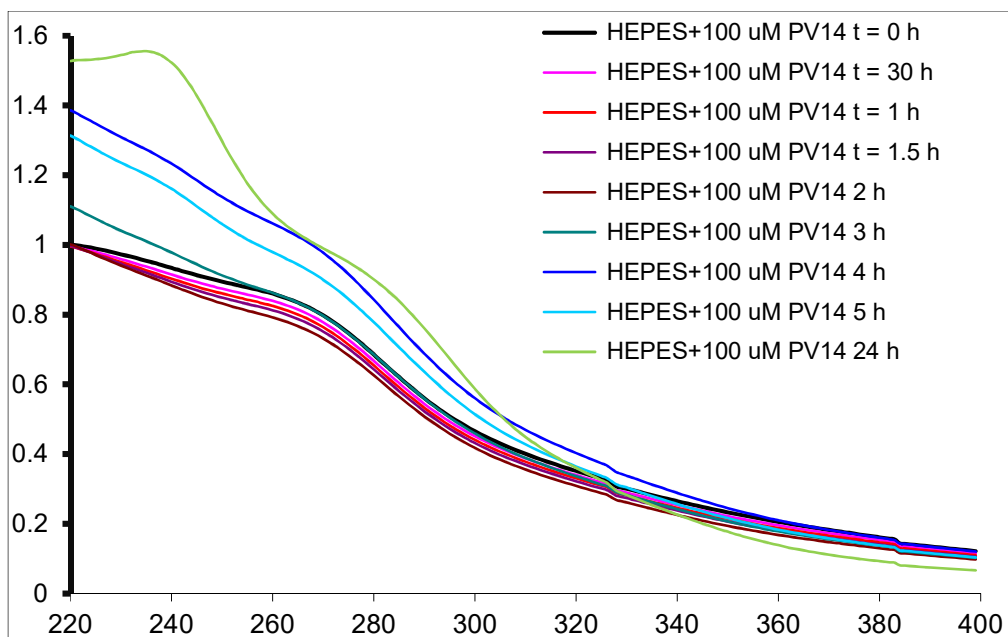

**Figure S7d** UV-Vis spectra of compound **2** at a concentration of 100 μM in HEPES buffer at pH = 7.0. Changes of spectra with time at room temperature; path length = 2.0 mm. Up to 2 h changes are observed, but for higher periods changes are much more significant, possibly due to precipitation or some other reason.



At pH = 7.0, in HEPES buffer and at low concentration, with time the PV14 polyanion progressively decomposes, yielding mostly V<sub>1</sub>, V<sub>2</sub> and V<sub>4</sub>, with lower extinction coefficients in the 270-370 nm range. It may be seen that the relative decrease in absorption values with time is higher at lower PV14 concentration, and decreases as the initial PV14 concentrations decrease.

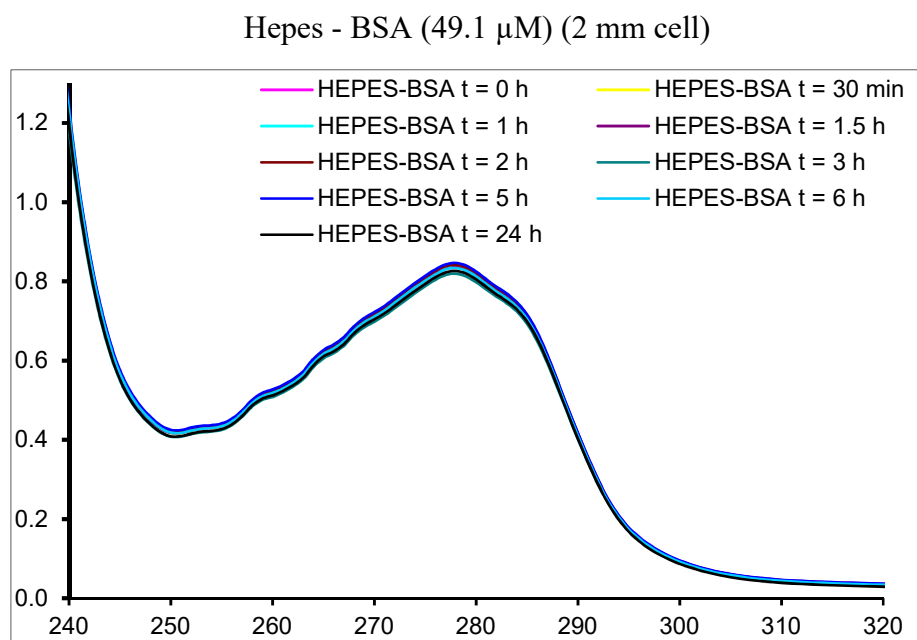

**Fig. S8** UV spectra of a solution of BSA at a concentration of 49.1  $\mu$ M in HEPES buffer at pH = 7.0, recorded with a path length = 2.0 mm. Changes of spectra with time at room temperature.

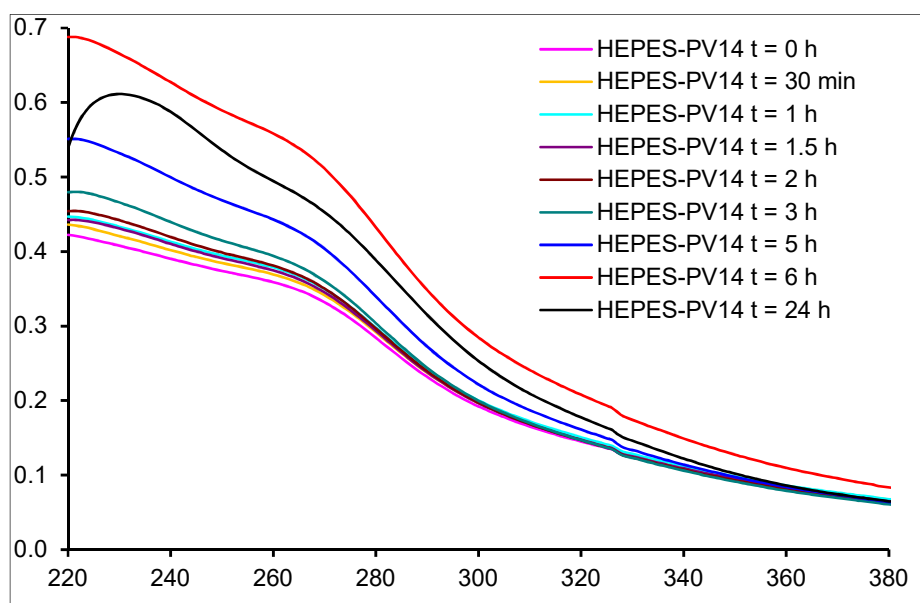

**Fig. S9** UV spectra of a solution containing compound **2** (49.1  $\mu\text{M}$ ) in Hepes buffer at pH = 7.0, with a path length = 2.0 mm. Changes of spectra with time at room temperature.

HEPES - PV14 (49.1  $\mu\text{M}$ ) - BSA (99.8  $\mu\text{M}$ ) - (2 mm cell)

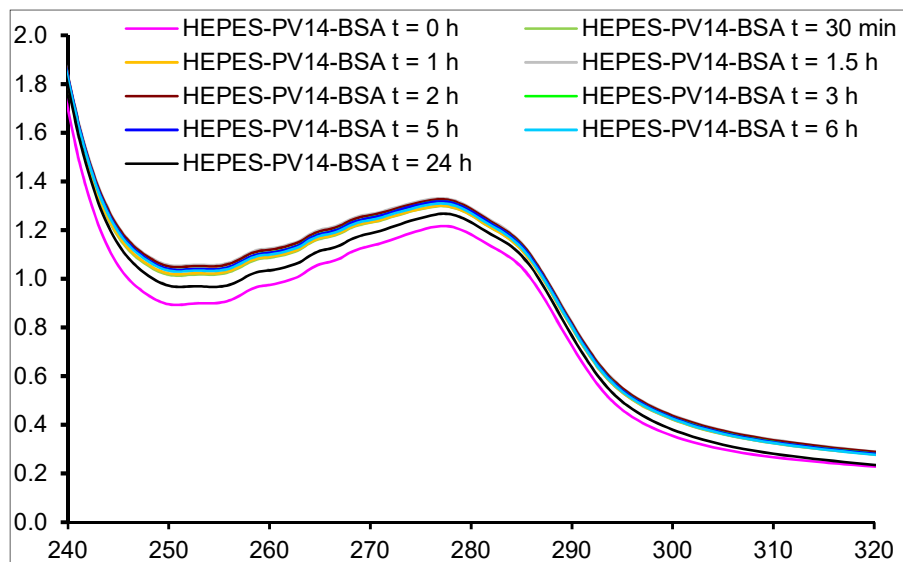

**Fig. S10** UV spectra of a solution containing BSA (99.8  $\mu\text{M}$ ) and compound **2** (49.1  $\mu\text{M}$ ) in Hepes buffer at pH = 7.0, with a path length = 2.0 mm. Changes of spectra with time at room temperature.

From the comparison of the spectra of Figs. S7-S10, it appears that the PV14 anions are somewhat stabilised when BSA is present in solution, but because several species may be present in solution, each contributing differently to the absorption, no definite conclusion can be safely concluded. Notwithstanding, clear changes are observed with time, indicating progressive hydrolysis of the polyanion. At lower concentrations of PV14 hydrolysis probably proceeds faster as the relative amounts of PV14 and other species present in solution markedly decrease with the total V concentration. The species distribution diagrams shown below in Figs. S16a-c demonstrate this.

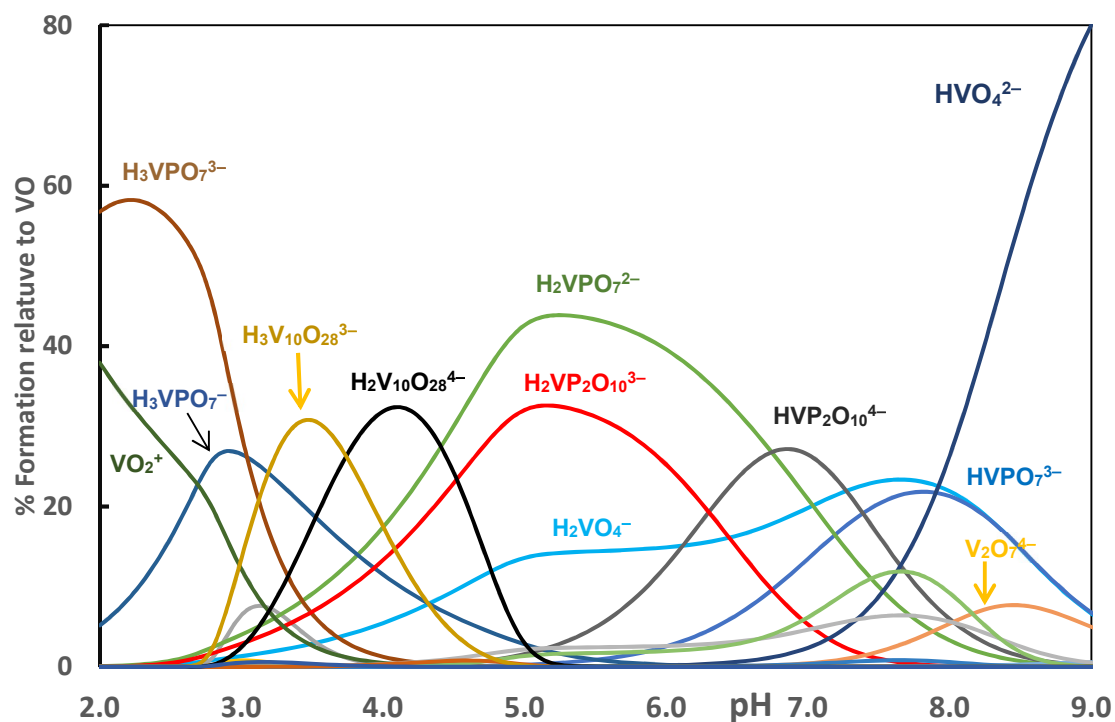

**Fig. S11** Species distribution diagrams calculated with the HySS program,<sup>1</sup> with the stability constants from Pettersson and co-workers<sup>2,3</sup> and with  $[V = H_2VO_4^-] = 1 \times 10^{-3} \text{ M}$  and  $[P = H_2PO_4^-]$  at  $1 \times 10^{-1} \text{ M}$ .

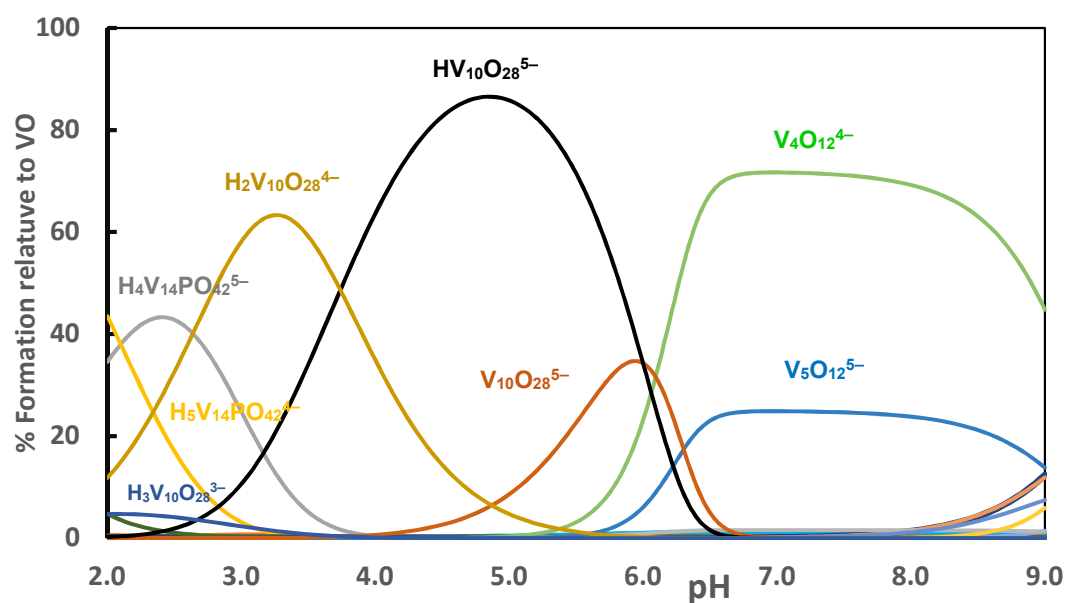

**Fig. S12** Species distribution diagrams calculated with the HySS program,<sup>1</sup> with the stability constants from Pettersson and co-workers<sup>2,3</sup> and with  $[V = H_2VO_4^-] = 1 \times 10^{-1} \text{ M}$  and  $[P = H_2PO_4^-]$  at  $1 \times 10^{-2} \text{ M}$ .

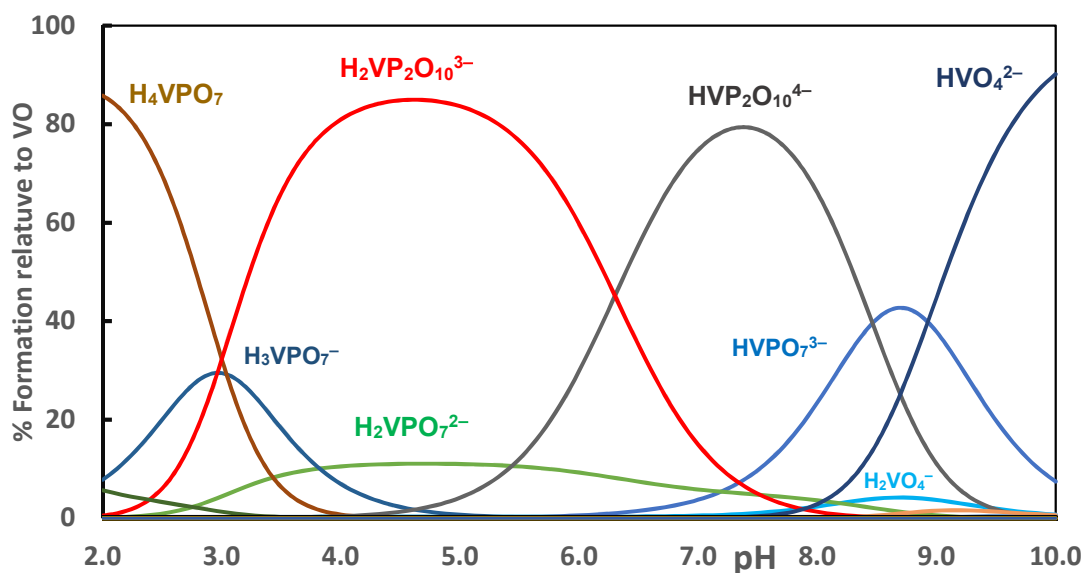

**Fig. S13** Species distribution diagrams calculated with the HySS program,<sup>1</sup> with the stability constants from Pettersson and co-workers<sup>2,3</sup> and with  $[V = H_2VO_4^-] = 1 \times 10^{-3} \text{ M}$  and  $[P = H_2PO_4^-]$  at 1 M.

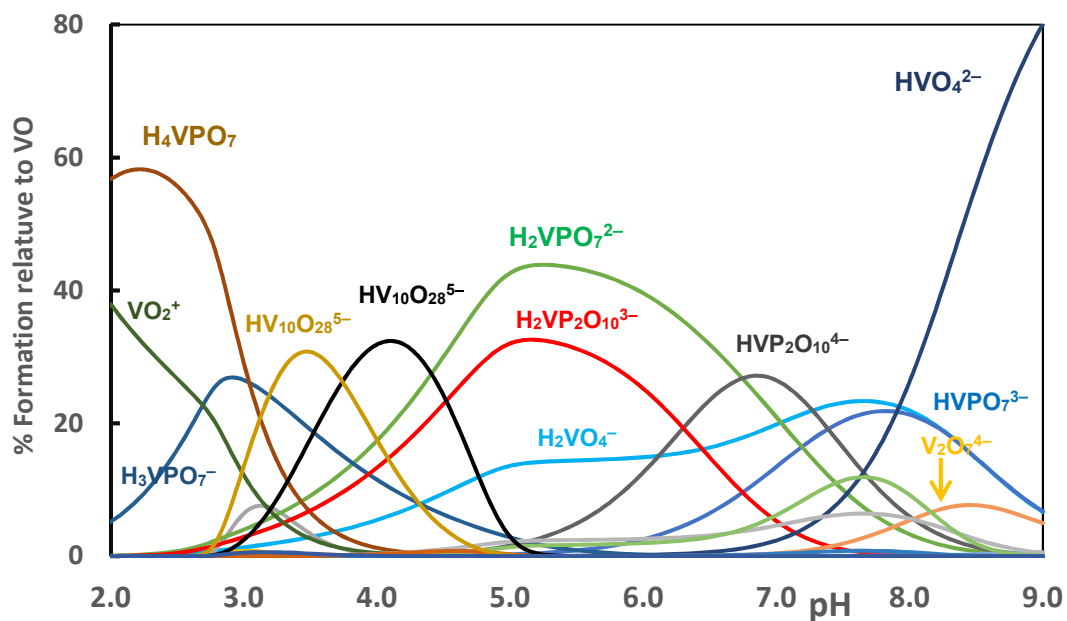

**Fig. S14** Species distribution diagrams calculated with the HySS program,<sup>1</sup> with the stability constants from Pettersson and co-workers<sup>2,3</sup> and with  $[V = H_2VO_4^-] = 1 \times 10^{-3} \text{ M}$  and  $[P = H_2PO_4^-]$  at 0.1 M.

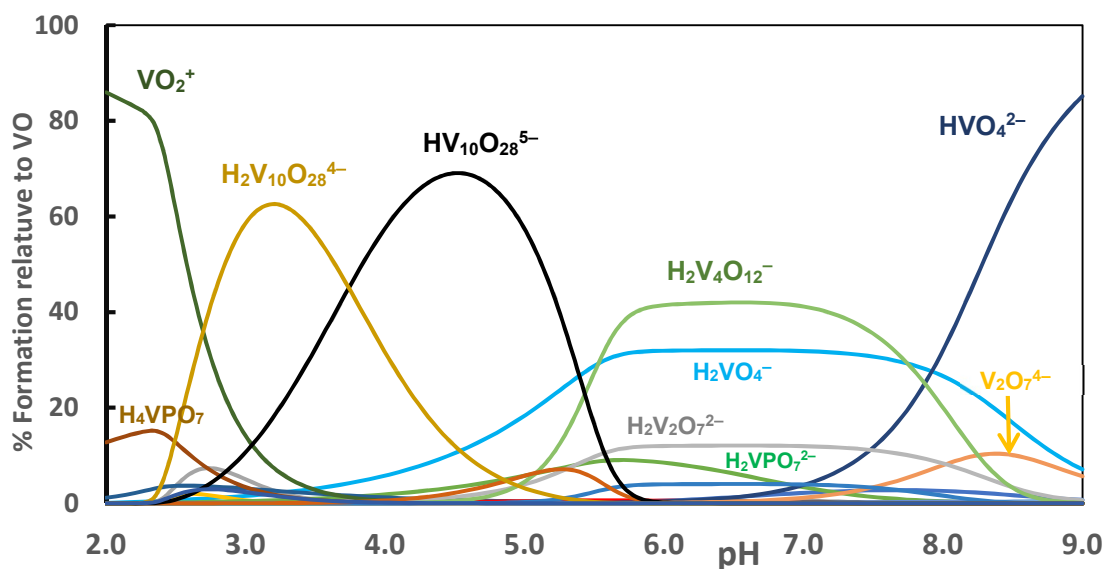

**Fig. S15** Species distribution diagrams calculated with the HySS program,<sup>1</sup> with the stability constants from Pettersson and co-workers<sup>2,3</sup> and with  $[\text{V} = \text{H}_2\text{VO}_4^-] = 1 \times 10^{-3} \text{ M}$  and  $[\text{P} = \text{H}_2\text{PO}_4^-]$  at  $1 \times 10^{-2} \text{ M}$ .

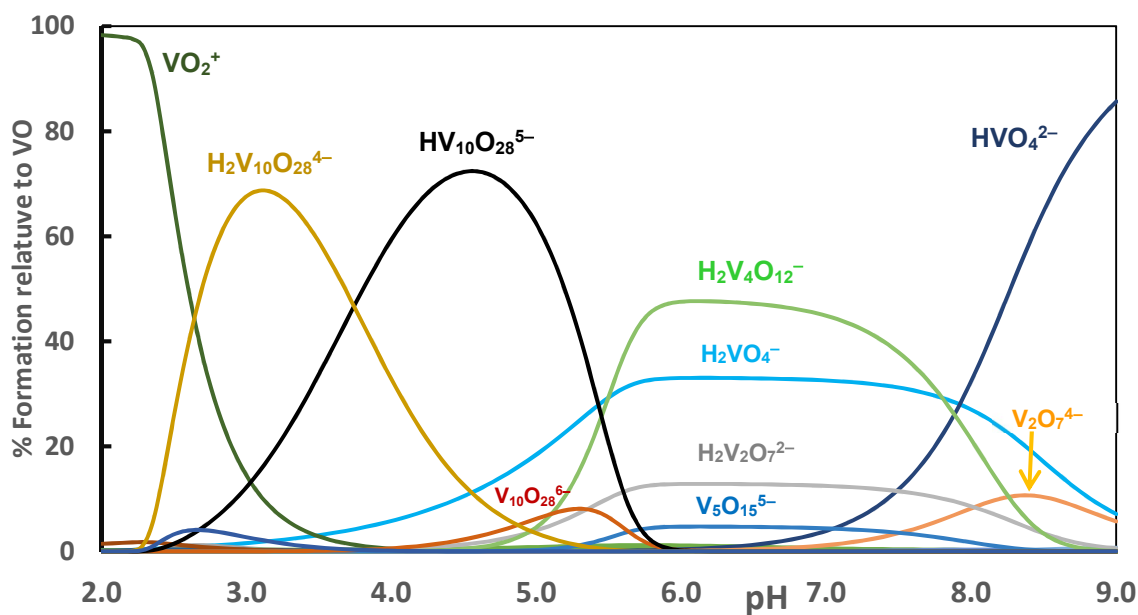

**Fig. S16** Species distribution diagrams calculated with the HySS program,<sup>1</sup> with the stability constants from Pettersson and co-workers<sup>2,3</sup> and with  $[\text{V} = \text{H}_2\text{VO}_4^-] = 1 \times 10^{-3} \text{ M}$  and  $[\text{P} = \text{H}_2\text{PO}_4^-]$  at  $1 \times 10^{-3} \text{ M}$ .

## Fluorescence spectroscopy data

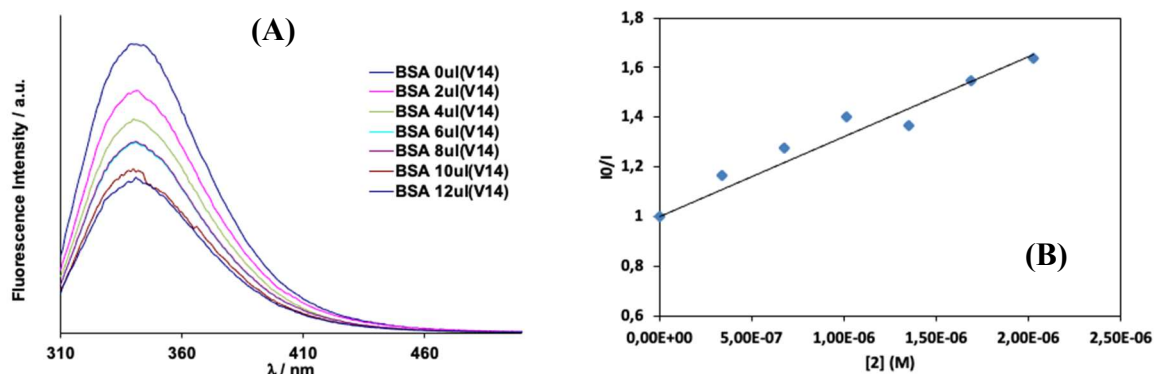

**Fig. S17** Fluorescence emission spectra recorded at room temperature for solutions containing BSA (1.5  $\mu\text{M}$ ) and increasing amounts of **2** (0.33 – 2.02  $\mu\text{M}$ ) with  $\lambda_{\text{exc}} = 340$  nm, in HEPES buffer 10 mM, pH 7.1. The inset shows the variation of % fluorescence intensity at the maximum  $\lambda_{\text{em}} = 340$  nm with the compound concentration. (B) Stern Volmer plot at  $\lambda_{\text{em}} = 340$  nm ( $R^2 = 0.938$ ). Data from a distinct experiment is depicted in Fig. S18.

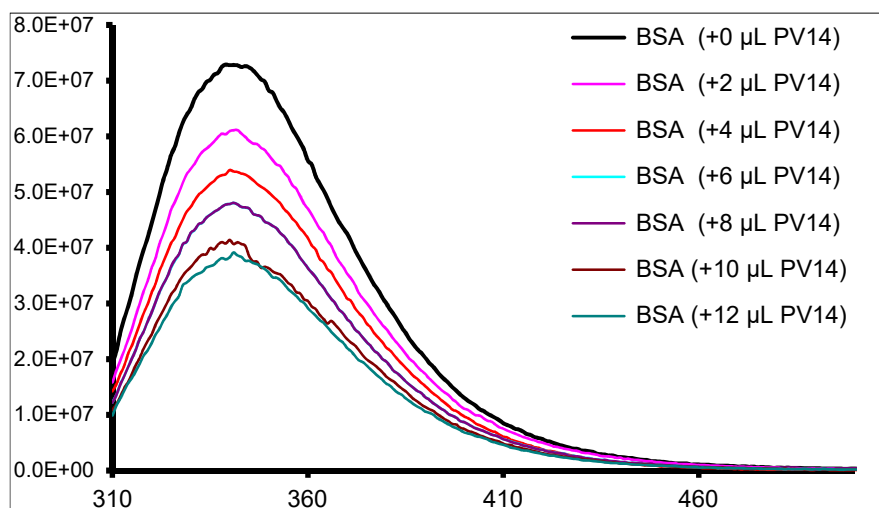

**Fig. S18** Fluorescence spectra of solutions containing BSA (1.55  $\mu\text{M}$ ) and upon additions of compound **2** (508  $\mu\text{M}$ ) in HEPES buffer at pH = 7.0. Each addition of compound **2** corresponds to an increase of the PV14: BSA molar ratio of 0.218. Upon addition of 12  $\mu\text{L}$  of **2**, the PV14: BSA molar ratio is 1.31.

The interaction with BSA with 3-picoline and methenamine was also accessed by fluorescence emission spectroscopy. The solution inside the 10 $\times$ 10 mm cell contains *ca.* 1.5  $\mu\text{M}$  of BSA and

additions of small amounts of each amine were done increasing its concentration in small steps up to final ratios amine/BSA of 4.0 and 10.0 for methenamine and 3-picoline, respectively. Blank assays in the absence of BSA were used to subtract the baseline and UV-Vis spectra of each ratio on each titration were also collected to correct the fluorescence emission.

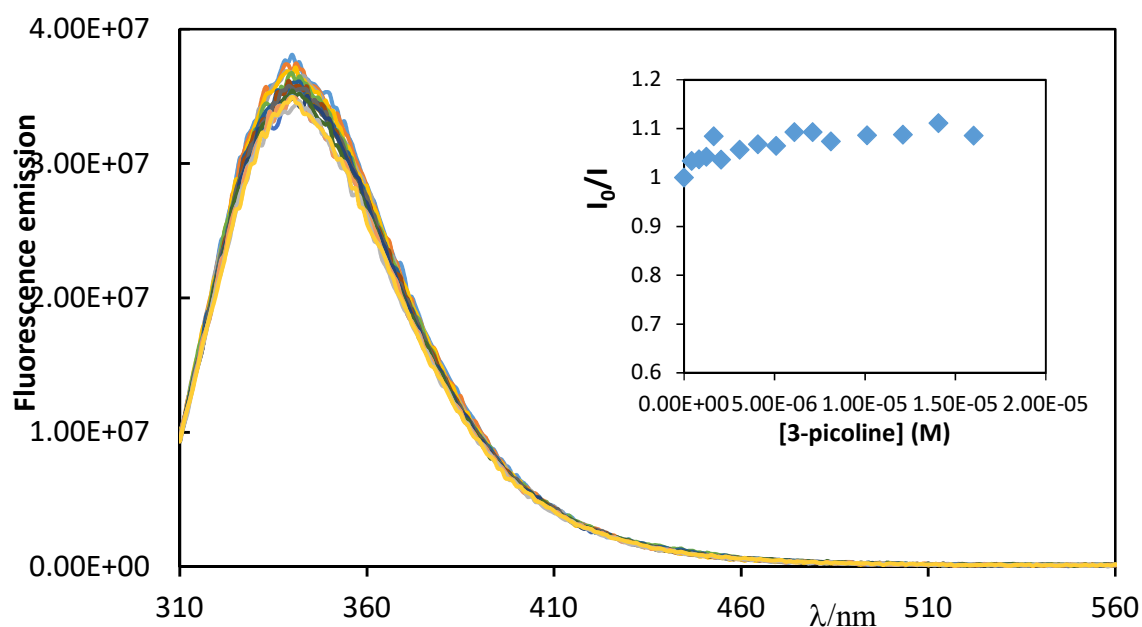

**Fig. S19** Fluorescence emission of a 1.6  $\mu\text{M}$  solution of BSA and upon increasing concentrations of 3-picoline (0 – 16.0  $\mu\text{M}$ ). The measurements were done in 10 mM Hepes buffer at pH 7.1 and  $I=$  150 mM NaCl and using  $\lambda_{\text{ex}}=$  295 nm. The spectra were subtracted of the correspondent blank having the same concentration of the amine in the absence of the protein. The inset depicts the Stern-Volmer plot at 340 nm where it is possible to observe the lack of quenching effect.

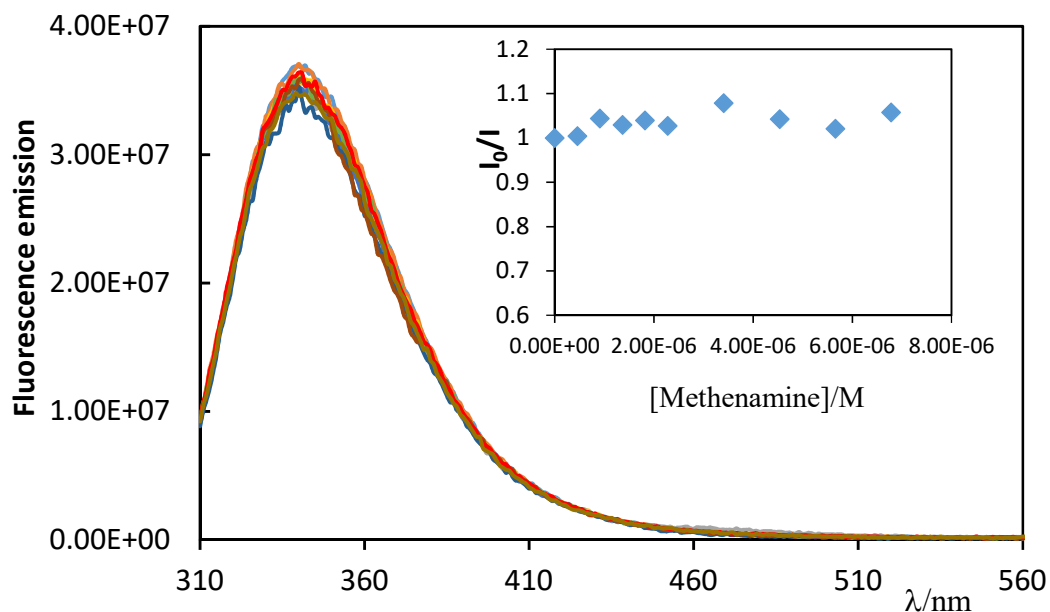

**Fig. S20** Fluorescence emission of a 1.6  $\mu\text{M}$  solution of BSA and upon increasing concentrations of methenamine (0 – 6.8  $\mu\text{M}$ ). The measurements were done in 10 mM Hepes buffer at pH 7.1 and  $I=$  150 mM NaCl and using  $\lambda_{\text{ex}}=$  295 nm. The spectra were subtracted with the correspondent blank having the same concentration of the amine in the absence of the protein. The inset shows the Stern-Volmer plot at 340 nm where it is possible to confirm the lack of quenching effect.

### CD spectra with solutions of ctDNA

The CD experiments were done using ctDNA in concentration *ca.* 55  $\mu\text{M} \cdot \text{nuc}^{-1}$  in aqueous buffer 10 mM Hepes, 150 mM NaCl and pH 7.1. Stock solutions of methenamine (4 mg/ 5 mL of  $\text{H}_2\text{O}$ ) and of 3-picoline (5  $\mu\text{L}$ / 10 mL  $\text{H}_2\text{O}$ ) were added to the 1.0 cm cell in a way that the ratio amine/DNA increases in small steps up to final ratios of 3.0 and 6.0, respectively. Each spectrum is the result of 2 accumulations with a scan speed of 100 nm/min and a resolution of 0.5 nm.



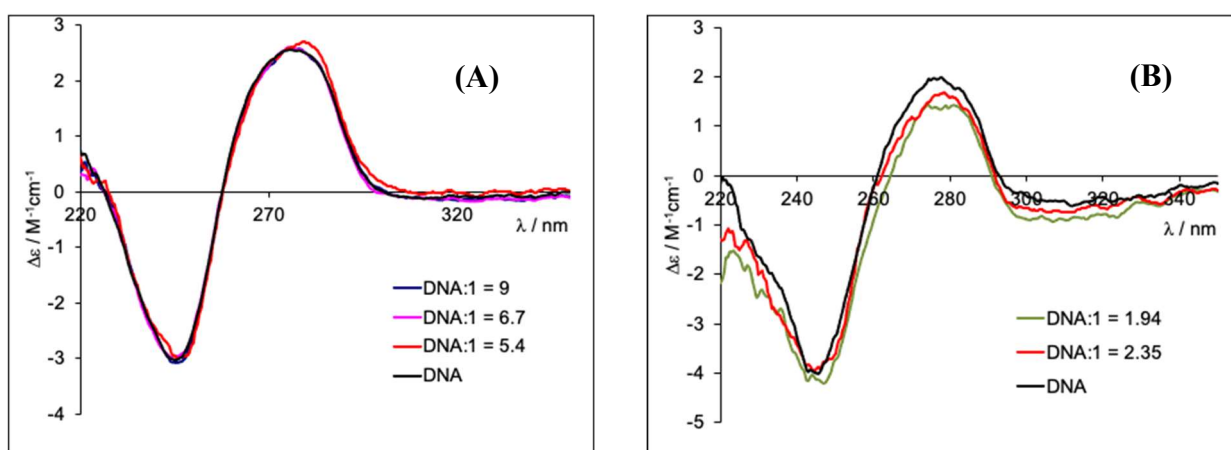

**Fig. S21** CD spectra of solutions containing ctDNA in HEPES buffer (10 mM, pH = 7.1) and compound **1** (A) measured with a 10 mm optical path cell, (B) measured with a 5 mm optical path cell. The initial concentration of ctDNA was  $54.1 \mu\text{M nuc}^{-1}$  and a solution of **1** with a concentration of  $38.6 \mu\text{M}$  was progressively added.

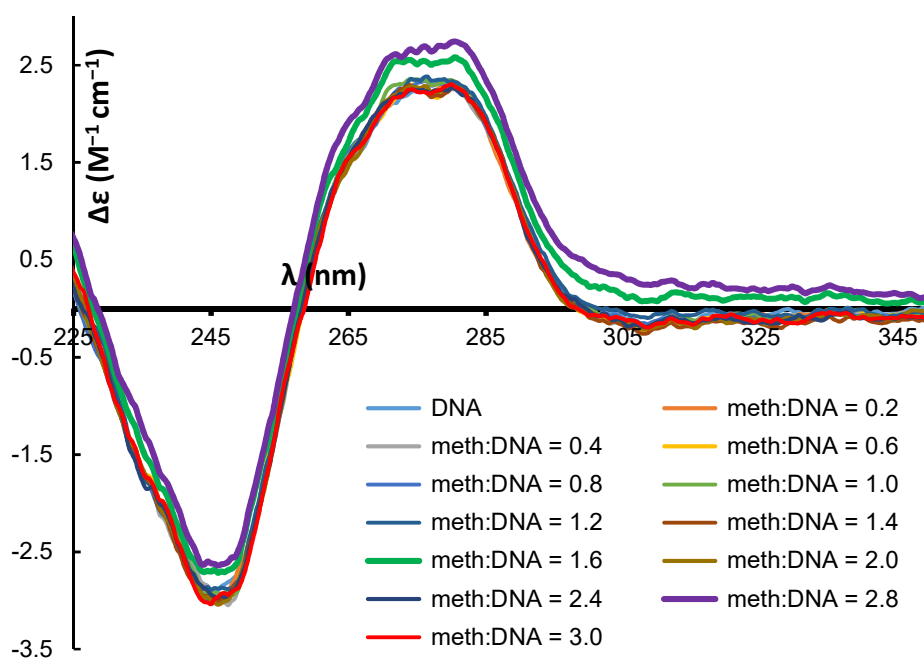

**Fig. S22a** CD spectra of solutions containing ctDNA in HEPES buffer (10 mM, 150 mM NaCl and pH = 7.1) and methenamine measured with a 10 mm optical path cell. The initial concentration of ctDNA was  $59.6 \mu\text{M nuc}^{-1}$  and a solution of methenamine with a concentration of 5.71 mM was progressively added.

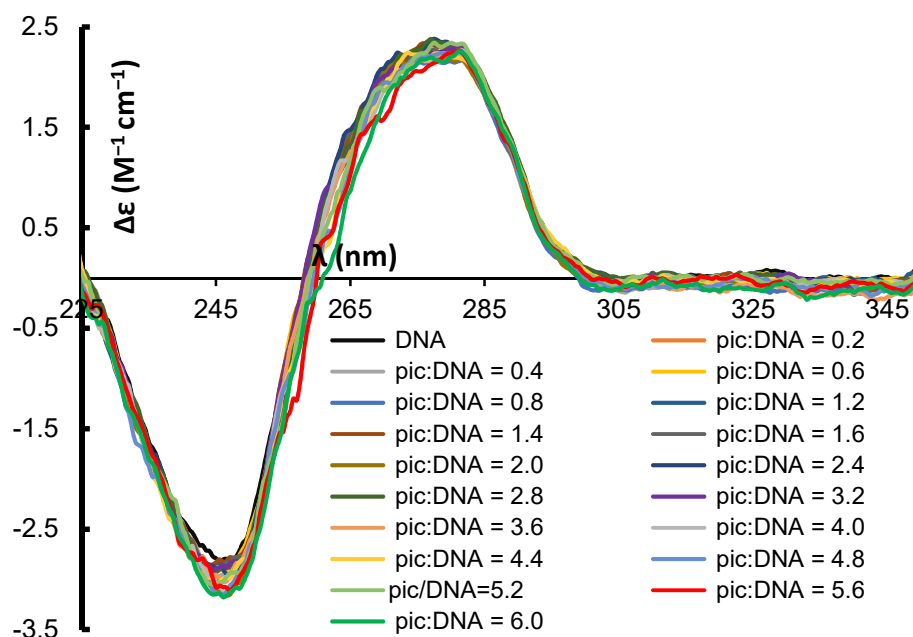

**Fig. S22b** CD spectra of solutions containing ctDNA in Hepes buffer (10 mM, 150 mM NaCl and pH = 7.1) and 3-picoline measured with a 10 mm optical path cell. The initial concentration of ctDNA was  $53.6 \mu M nuc^{-1}$  and a solution of 3-picoline with a concentration of 5.14 mM was progressively added.

## CD spectra of solutions of CT-DNA with additions of NaVO<sub>4</sub>

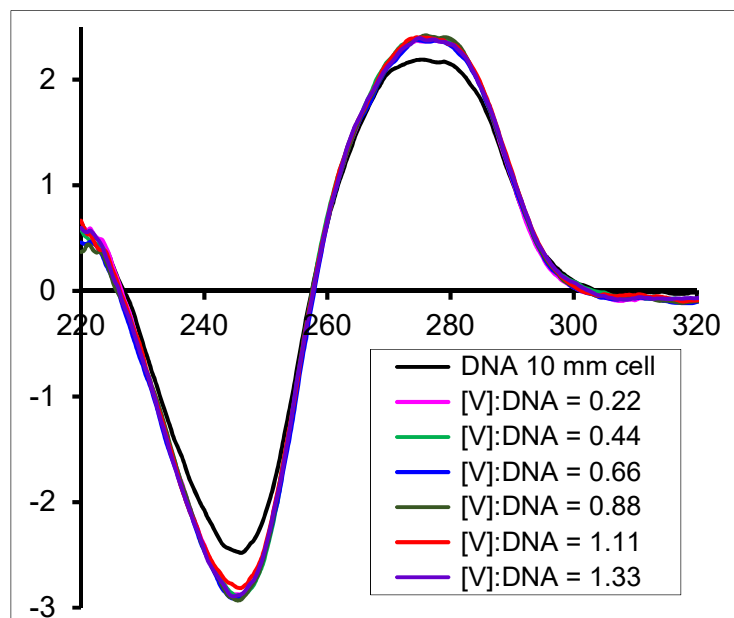

**Fig. S23** CD spectra of solutions containing ctDNA in HEPES buffer (10 mM, pH = 7.1) and sodium vanadate measured with a 10 mm optical path cell. The initial concentration of ctDNA was 81.5  $\mu\text{M nuc}^{-1}$  and a solution of sodium vanadate with a concentration of 865  $\mu\text{M}$  was progressively added. No clear trend of changes may be seen in this wavelength range.

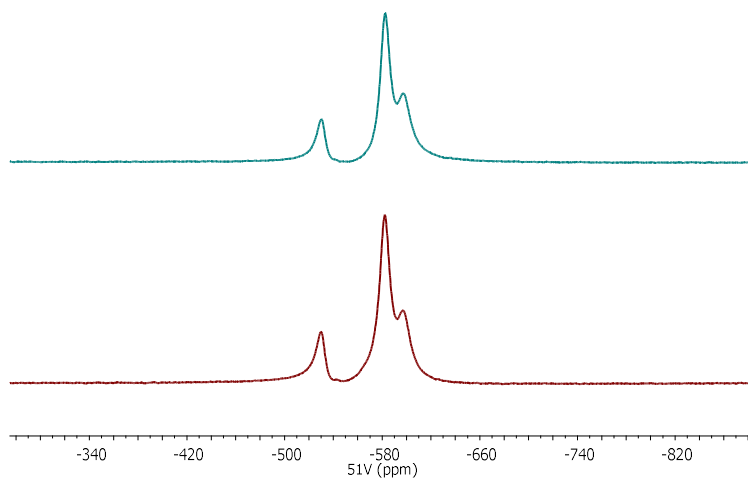

**Fig. S24**  $^{51}\text{V}$  NMR spectra of compound **1** (*ca.* 6 mM) in  $\text{D}_2\text{O}$  at pH 2.75 at time 0 (top) and after 24 h (bottom).

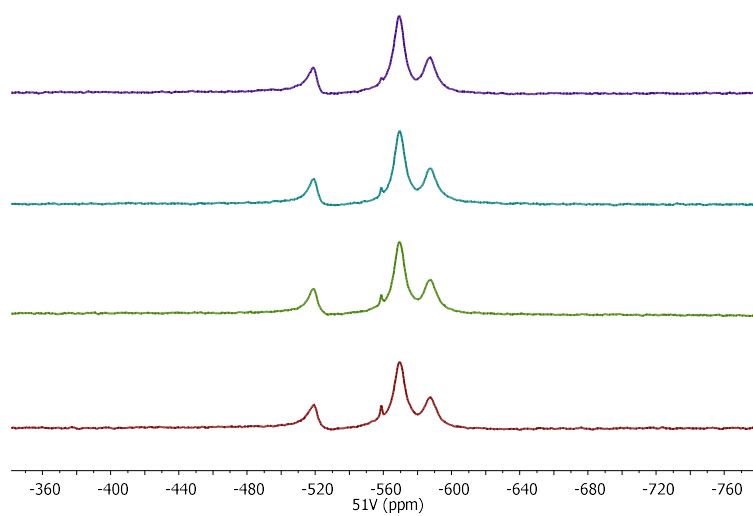

**Fig. S25**  $^{51}\text{V}$  NMR spectra of compound **1** (0.9 mM) in HEPES buffer (10 mM HEPES, 150 mM NaCl, pH 7.1) at time 0, 3, 6 and 24 h (from top to bottom).

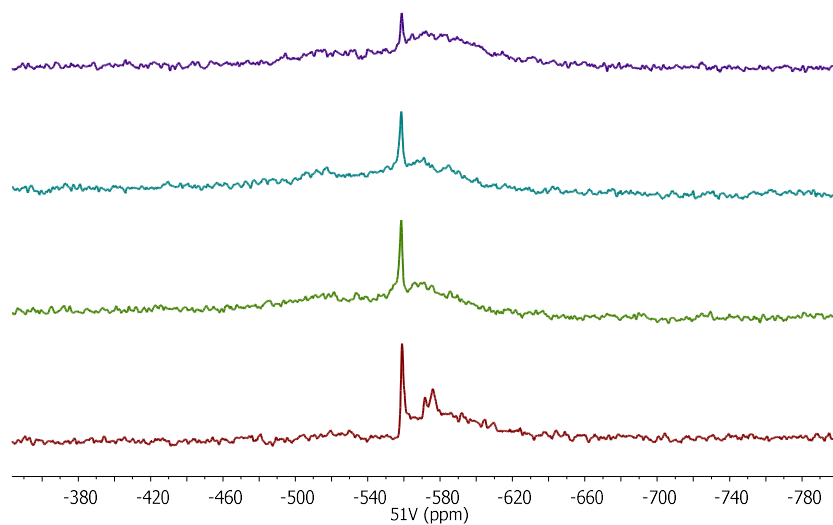

**Fig. S26a**  $^{51}\text{V}$  NMR spectra of compound **1** (0.9 mM) in Hepes buffer (10 mM Hepes, 150 mM NaCl, pH 7.1) at time 0, 3, 6 and 24 h (from top to bottom) in the presence of BSA ([BSA]/[compound]= 0.3).

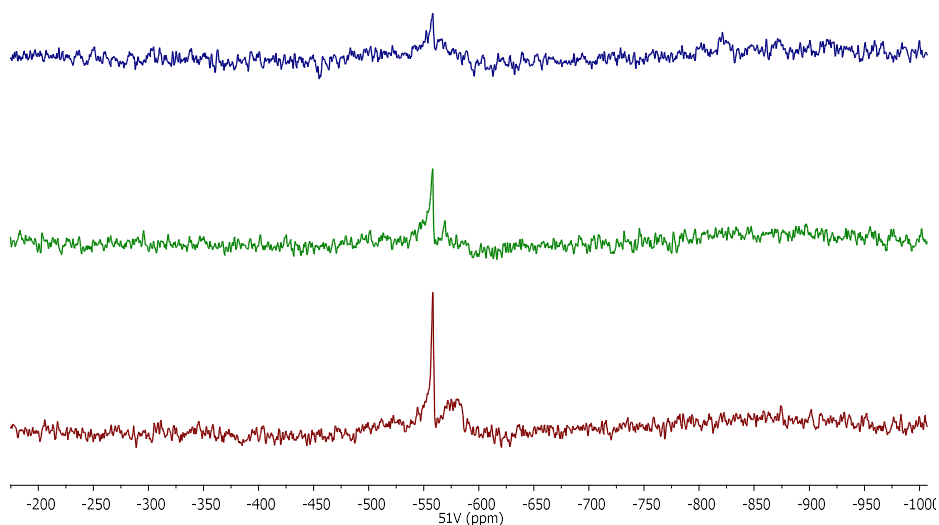

**Fig. S26b**  $^{51}\text{V}$  NMR spectra of compound **1** (0.5 mM) in Hepes buffer (10 mM Hepes, 150 mM KCl, pH 7.1) at time 0, 3 and 40 h (from top to bottom) in the presence of BSA ([BSA]/[compound] = 1.6).

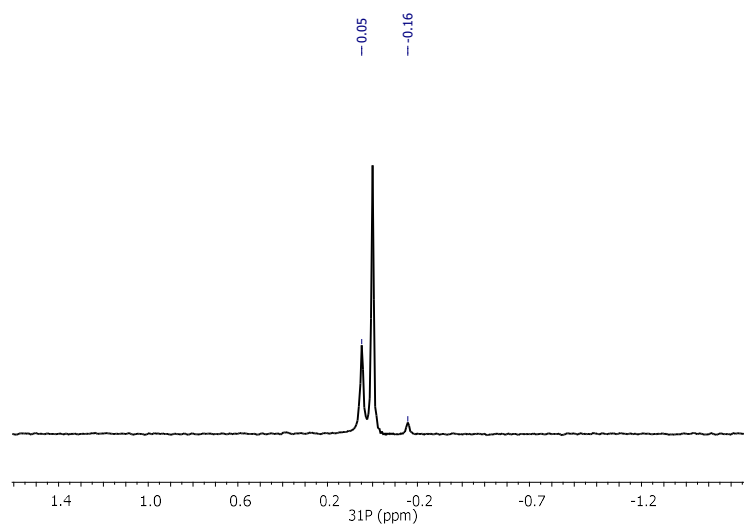

**Fig. S27**  $^{31}\text{P}$  NMR spectrum of compound **1** (ca. 6 mM) in  $\text{D}_2\text{O}$  at pH 2.75. The signal at 0.0 ppm is 1%  $\text{H}_3\text{PO}_4$  in  $\text{D}_2\text{O}$  was taken as reference.

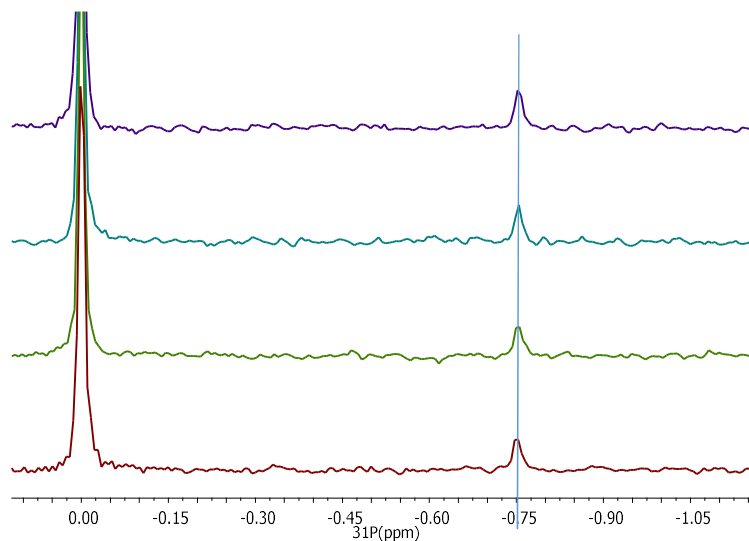

**Fig. S28**  $^{31}\text{P}$  NMR spectrum of compound **1** (0.9 mM) in Hepes buffer (10 mM Hepes, 150 mM NaCl, pH 7.1) at time 0, 3, 6 and 24 h (from top to bottom). The signal at 0.0 ppm is 1%  $\text{H}_3\text{PO}_4$  in  $\text{D}_2\text{O}$  was taken as reference.

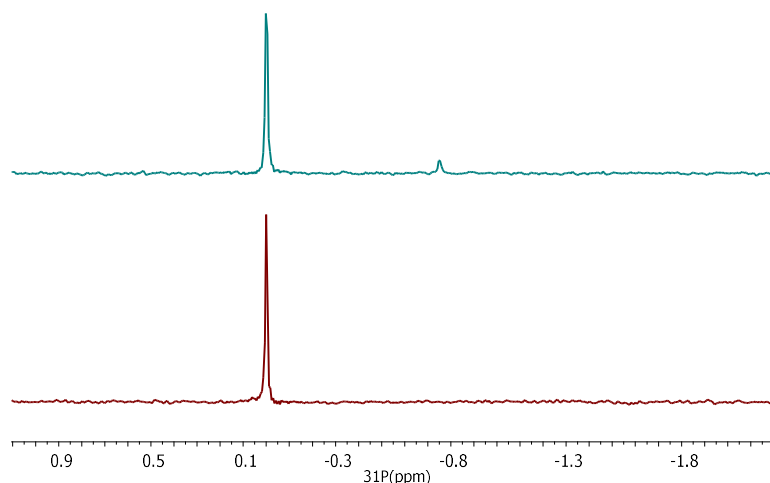

**Fig. S29**  $^{31}\text{P}$  NMR spectrum of compound **1** (0.9 mM) in Hepes buffer (10 mM Hepes, 150 mM NaCl, pH 7.1) in the absence (top) and in the presence of BSA (bottom,  $[\text{BSA}]/[\text{compound}] = 0.3$ ) at time 24 h. The signal at 0.0 ppm is 1%  $\text{H}_3\text{PO}_4$  in  $\text{D}_2\text{O}$  was taken as reference.

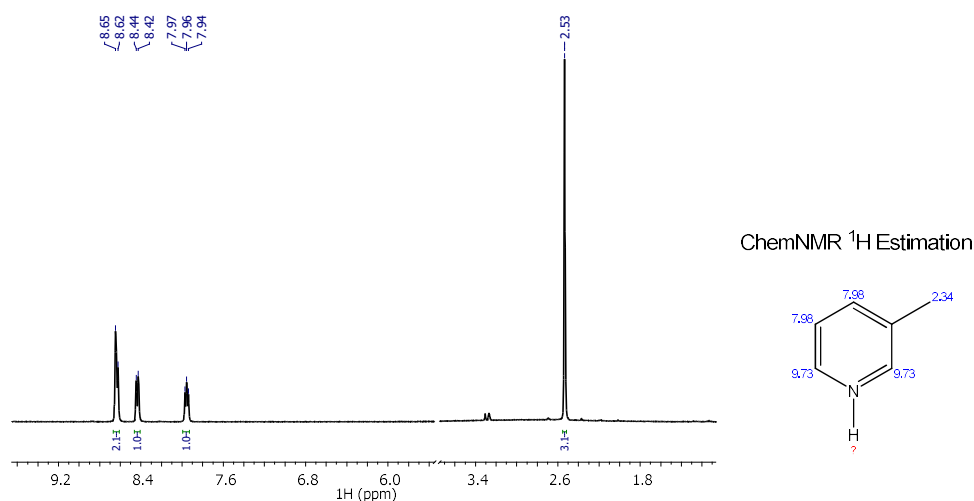

**Fig. S30**  $^1\text{H}$  NMR spectrum of compound **1** (*ca.* 6 mM) in  $\text{D}_2\text{O}$  at pH 2.75 and  $^1\text{H}$  NMR chemical shifts predicted by ChemBioDraw Ultra (version 11.0.1).

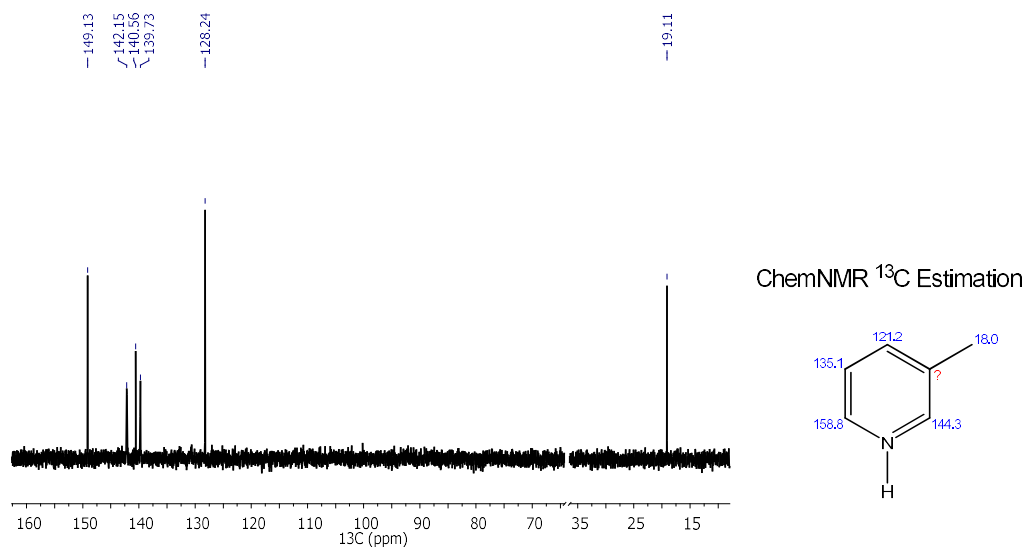

**Fig. S31**  $^{13}\text{C}$  NMR spectrum of compound **1** (*ca.* 6 mM) in  $\text{D}_2\text{O}$  at pH 2.75 and  $^{13}\text{C}$  NMR chemical shifts predicted by ChemBioDraw Ultra (version 11.0.1).



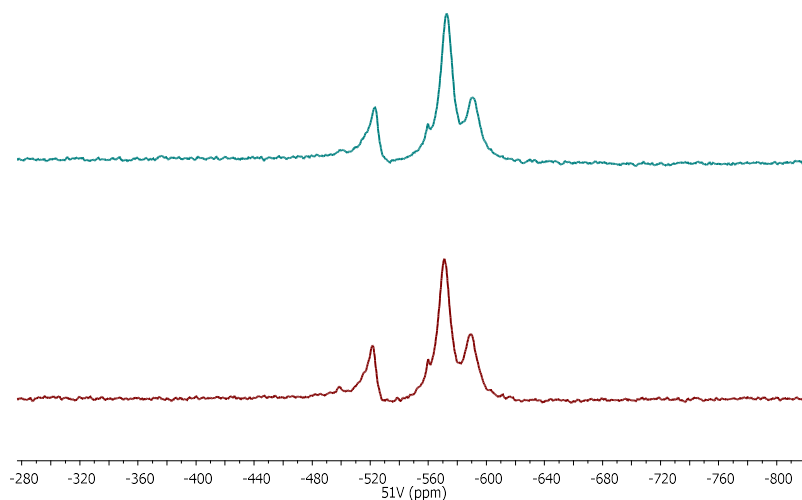

**Fig. S32**  $^{51}\text{V}$  NMR spectrum of compound **2** (*ca.* 4 mM) in  $\text{D}_2\text{O}$  at pH 2.75 at time 0 (top) and after 24 h (bottom).

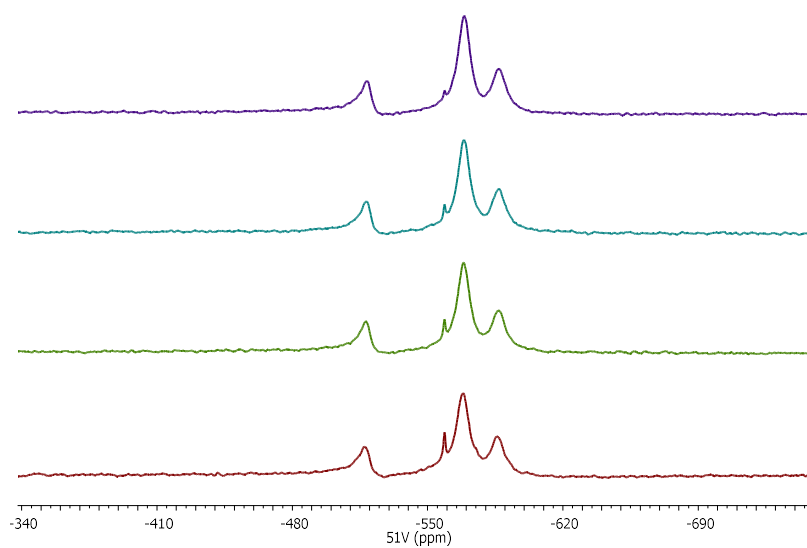

**Fig. S33**  $^{51}\text{V}$  NMR spectrum of compound **2** (0.9 mM) in HEPES buffer (10 mM HEPES, 150 mM NaCl, pH 7.1) at time 0, 3, 6 and 24 h (from top to bottom).

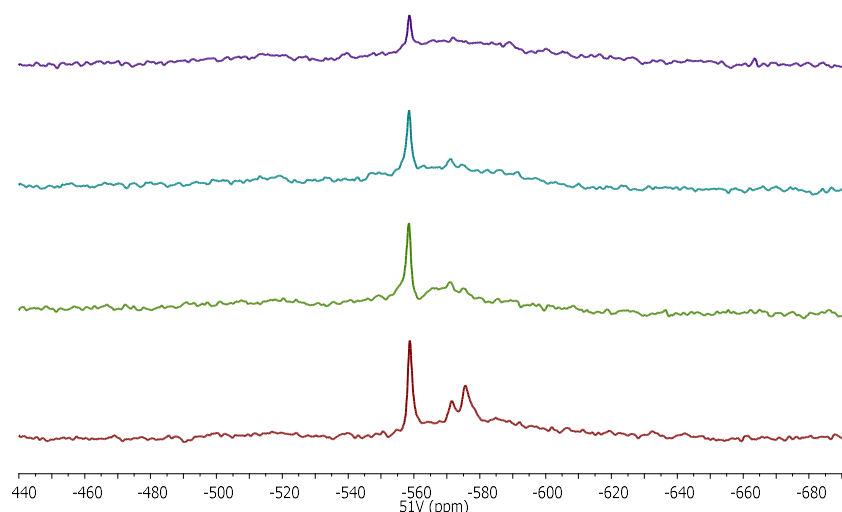

**Fig. S34a** <sup>51</sup>V NMR spectrum of compound **2** (0.9 mM) in Hepes buffer (10 mM Hepes, 150 mM NaCl, pH 7.1) at time 0, 3, 6 and 24 h (from top to bottom) in the presence of BSA ([BSA]/[compound]= 0.3).

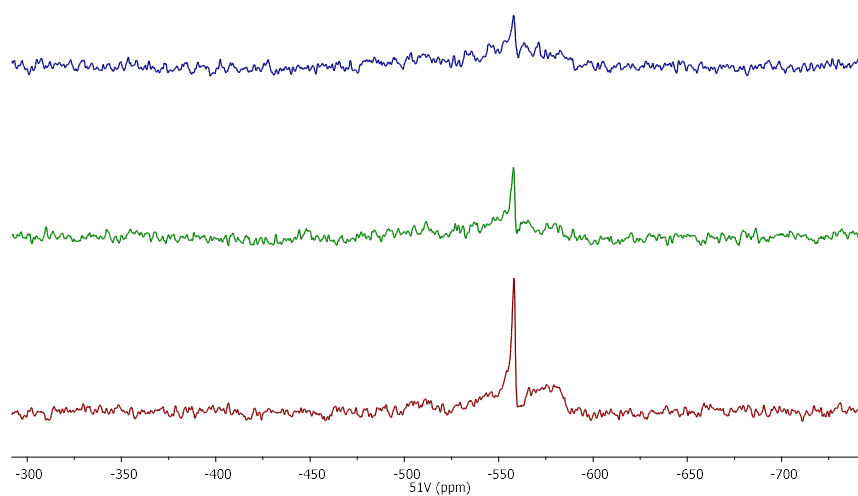

**Fig. S34b** <sup>51</sup>V NMR spectrum of compound **2** (0.5 mM) in Hepes buffer (10 mM Hepes, 150 mM KCl, pH 7.1) at time 0, 3 and 40 h (from top to bottom) in the presence of BSA ([BSA]/[compound]= 1.3).

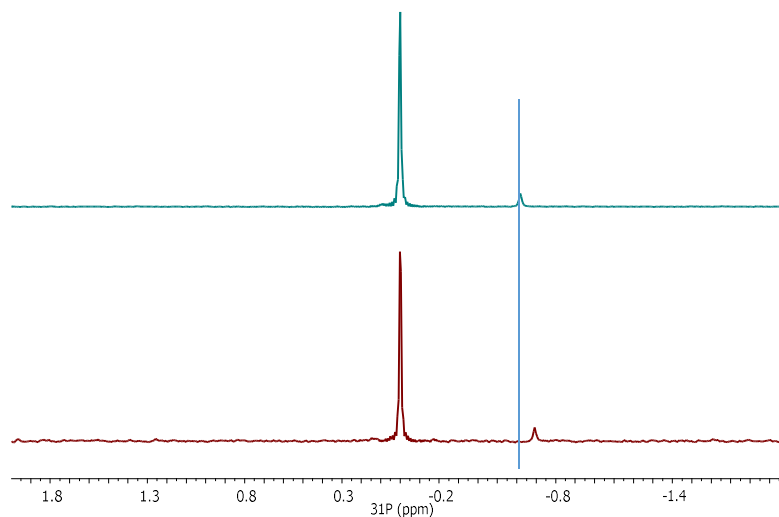

**Fig. S35**  $^{31}\text{P}$  NMR spectrum of compound **2** (*ca.* 4 mM) in  $\text{D}_2\text{O}$  at pH 2.75 at time 0 h (top) and after 24 h (bottom). The signal at 0.0 ppm is 1%  $\text{H}_3\text{PO}_4$  in  $\text{D}_2\text{O}$  was taken as reference.

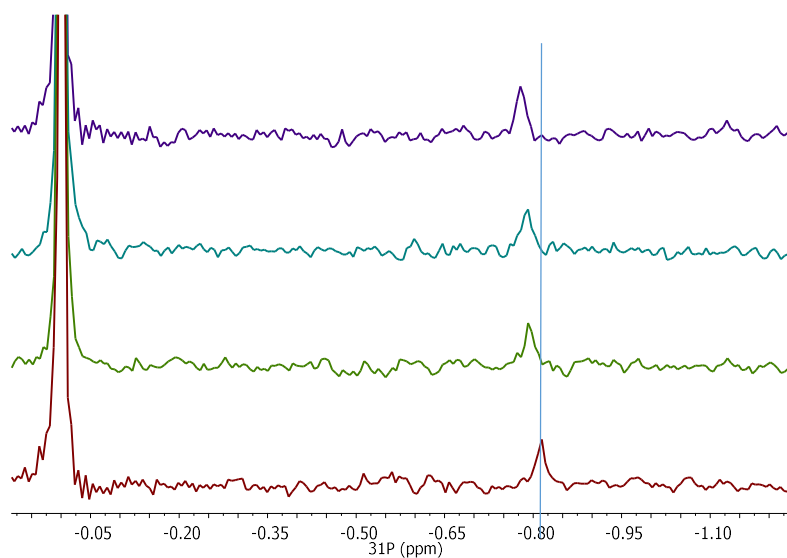

**Fig. S36**  $^{31}\text{P}$  NMR spectrum of compound **2** (0.9 mM) in Hepes buffer (10 mM Hepes, 150 mM NaCl, pH 7.1) at time 0, 3, 6 and 24 h (from top to bottom). The signal at 0.0 ppm is 1%  $\text{H}_3\text{PO}_4$  in  $\text{D}_2\text{O}$  was taken as reference.

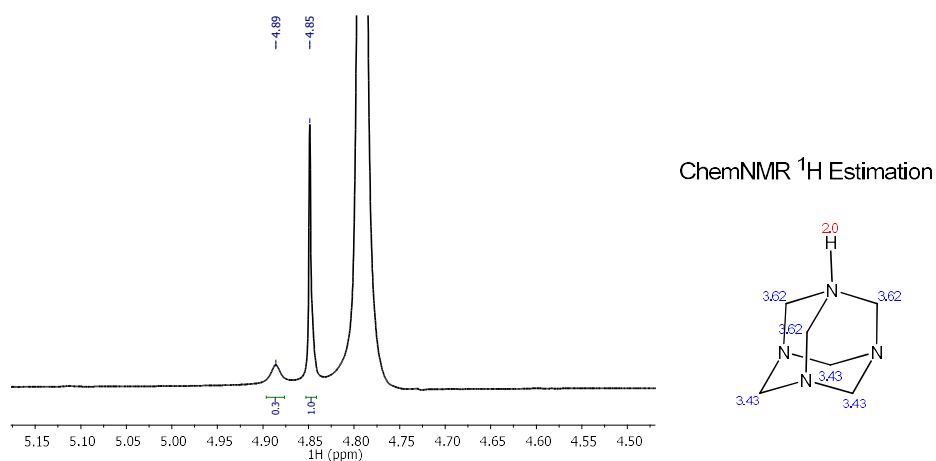

**Fig. S37** <sup>1</sup>H NMR spectrum of compound **2** (*ca.* 4 mM) in D<sub>2</sub>O at pH 2.75 and <sup>1</sup>H NMR chemical shifts predicted by ChemBioDraw Ultra (version 11.0.1).

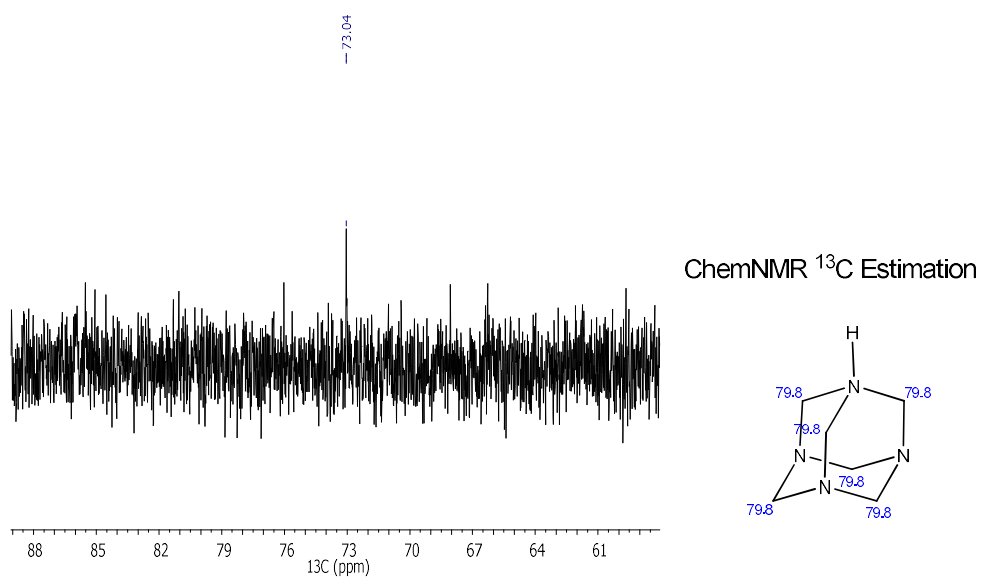

**Fig. S38** <sup>13</sup>C NMR spectrum of compound **2** (*ca.* 4 mM) in D<sub>2</sub>O at pH 2.75 and <sup>13</sup>C NMR chemical shifts predicted by ChemBioDraw Ultra (version 11.0.1).

## Thermogravimetric analysis of compounds 1 and 2

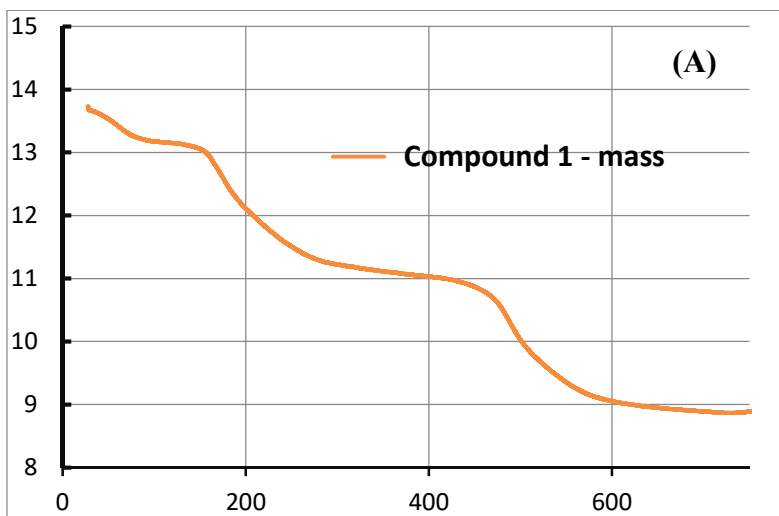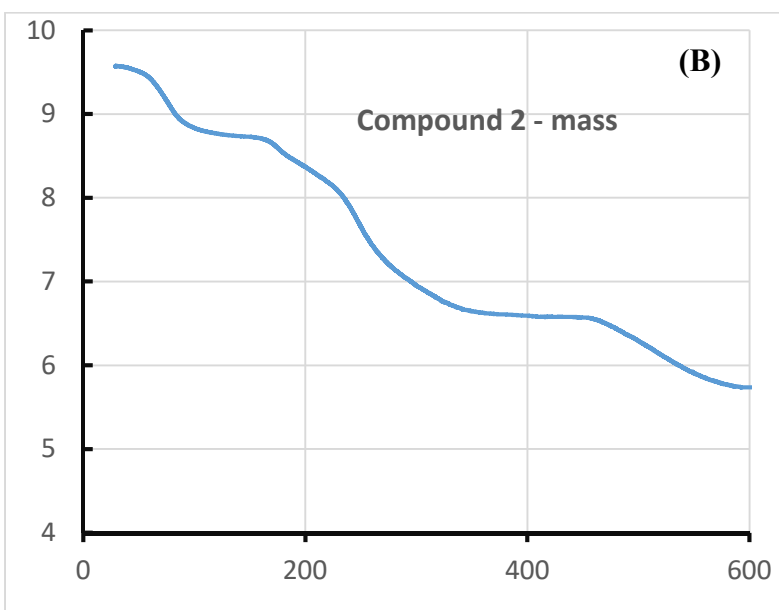

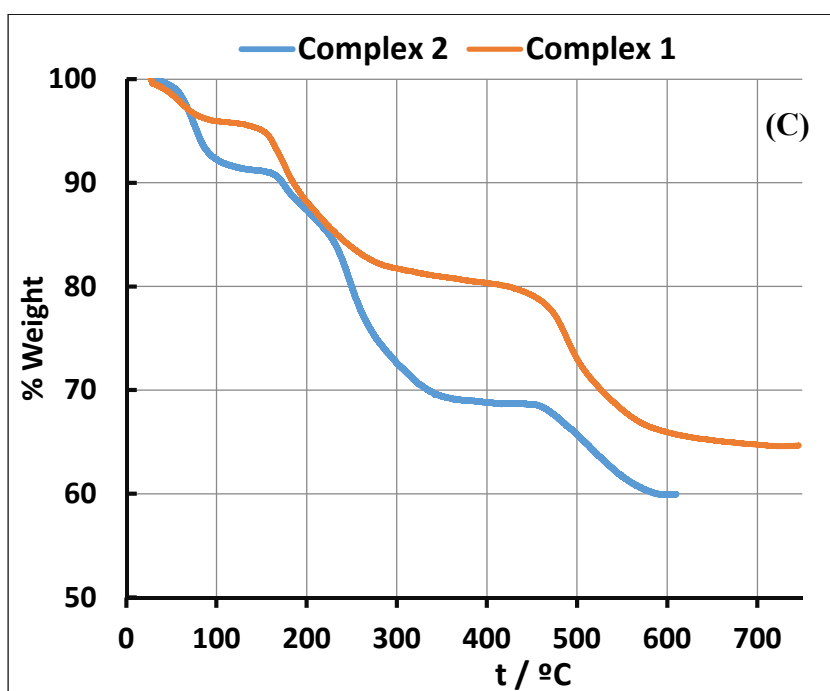

TGA profile for compounds **1**

**Fig. S39** Thermograms of compounds **1** (A) and **2** (B) under N<sub>2</sub> atmosphere (see experimental part for details). Fig. (C) corresponds to the thermograms in % of initial masses of compounds **1** and **2**.

The TG of **1** reveals a mass loss of around 5.3% up to 155 °C. This corresponds to 5 water molecules, which agrees with those determined by SC-XRD. Then, there is a mass loss of ca. 16% up to 400 °C. The total mass loss of **1** was 35.8 %, the final residue corresponding to 64.2 %. The composition of this residue was not determined. Many phosphorous compounds in TG experiments loose totally their mass up to 600-700 °C<sup>4-6</sup>, others not. The final residue of vanadium compounds at ca. 700 °C is typically considered as V<sub>2</sub>O<sub>5</sub>. If this is assumed the final amount of this vanadium oxide may be used to estimate the %V in compound **1**, yielding 36.0%, matching what is expected in its formulation: {(C<sub>6</sub>H<sub>8</sub>N)<sub>5</sub>[H<sub>4</sub>PV<sub>14</sub>O<sub>42</sub>]·5H<sub>2</sub>O}. The organic moieties and probably the phosphorous are lost in two steps (1<sup>st</sup>: 160-300 °C; 2<sup>nd</sup> 400-650 °C), but these cannot be correlated with the composition of compound **1** in a straightforward fashion.

The TG of **2** reveals a mass loss of around 10.3% up to 170 °C. This corresponds to 10.8 water molecules, which agrees with those determined by SC-XRD. Then, there is a mass loss of ca. 22% up to 450 °C due to the organic cations and other components of **2**. The final residue at ca. 600 °C corresponds to ca. 60% of the initial mass. As in the case of **1** the composition of this residue was not determined, but if we assume it corresponds to V<sub>2</sub>O<sub>5</sub> If this is assumed the final amount of this

vanadium oxide may be used to estimate the %V in compound **1**, yielding ~31.0%, lower than that expected (37%). The only explanation we may find for this discrepancy is that the sample used for TG analysis was not of the same batch as the crystals used in SC-XRD and in most other experiments.

## References

- 1 L. Alderighi, P. Gans, A. Ienco, D. Peters, A. Sabatini and A. Vacca, *Coord. Chem. Rev.*, 1999, **184**, 311-318.
- 2 I. Andersson, A. Gorzsas, C. Kerezsi, I. Tóth and L. Pettersson, *Dalton Trans.*, 2005, 3658-3666.
- 3 A. Selling, I. Andersson, L. Pettersson, C. M. Schramm, S. L. Downey and J. H. Grate, *Inorg. Chem.*, 1994, **33**, 3141–3150.
- 4 J. C. Markwart, A. Battig, L. Zimmermann, M. Wagner, J. Fischer, B. Schartel and F. R. Wurm, *ACS Appl. Polym. Mater.*, 2019, **1**, 1118-1128.
- 5 K. A. Salmeia, F. Flaig, D. Rentsch and S. Gaan, *Polymers*, 2018, **10**, 740
- 6 X. Lai, J. Qiu, H. Li, X. Zeng, S. Tang, Y. Chen and Z. Chen, *Int. J. Pol. Sci.*, 2015, 360274
